1 **Sensory domain of the cell cycle kinase CckA in *Caulobacter crescentus***  
2 **regulates the differential DNA binding activity of the master regulator CtrA**

3

4 Sharath Narayanan, Lokesh Kumar and Sunish Kumar Radhakrishnan\*

5

6 School of Biology, Indian Institute of Science Education and Research,  
7 Thiruvananthapuram 695016, Kerala, India.

8

9 \*Correspondence to: [sunish@iisertvm.ac.in](mailto:sunish@iisertvm.ac.in)

10

11

12

13

14

15

16

17

18

19

20

21 **Abstract**

22 Sophisticated signaling mechanisms allow bacterial cells to cope with environmental  
23 and intracellular challenges. Activation of specific pathways facilitates the cells to  
24 overcome cellular damage and thereby warrant integrity. Here we demonstrate the  
25 pliability of the CckA-CtrA two component signaling system in the freshwater bacterium,  
26 *Caulobacter crescentus*. Our forward genetic screen to analyse suppressor mutations  
27 that can negate the chromosome segregation block induced by the topoisomerase IV  
28 inhibitor, NstA, yielded various point mutations in the cell cycle histidine kinase, CckA.  
29 Notably, we identified a point mutation in the PAS-B domain of CckA, which resulted in  
30 increased levels of phosphorylated CtrA (CtrA~P), the master cell cycle regulator.  
31 Surprisingly, this increase in CtrA~P levels did not translate into a genome-wide  
32 increase in the DNA occupancy of CtrA, but specifically enriched its affinity to the  
33 chromosomal origin of replication,  $C_{ori}$ , and a very small sub-set of CtrA regulated  
34 promoters. We show that through this enhanced binding of CtrA to the  $C_{ori}$ , cells are  
35 able to overcome the toxic defects rendered by stable NstA through a possible slow  
36 down in the chromosome cycle. Taken together, our work opens up an unexplored and  
37 intriguing aspect of the CckA-CtrA signal transduction pathway. The distinctive DNA  
38 binding nature of CtrA and its regulation by CckA might also be crucial for pathogenesis  
39 because of the highly conserved nature of CckA-CtrA pathway in alphaproteobacteria.

40

41

42

## 43 Introduction

44 Bacteria harbor robust signaling mechanisms, to respond to numerous  
45 environmental challenges both inside and outside the cell. Exquisitely fine tuned  
46 regulatory cascades in bacteria impart their effect at a precise spatio-temporal scale to  
47 bring about specific morphological and functional programs, in response to the changes  
48 in the internal or external milieu. The aquatic  $\alpha$ -proteobacterium, *Caulobacter*  
49 *crescentus* (henceforth *Caulobacter*), has emerged as a powerful model organism for  
50 studying the complex signaling mechanisms that control cell cycle and development in  
51 response to environmental cues. During its cell cycle, *Caulobacter* undergoes  
52 asymmetric division to produce progenies with distinct developmental fates. One of the  
53 daughter cells, the swarmer cell, acquires a dispersal fate wherein its motility is assisted  
54 by the polar flagellum and a tuft of pili (1,2). In contrast, the stalked daughter cell  
55 acquires a sedentary fate and is in an S-phase-like state capable of replicating its  
56 chromosome and proliferating by cytokinesis (Figure 1A) (3,4). The G1-like swarmer cell  
57 has to terminally differentiate into a stalked cell to enter into the proliferative phase. This  
58 G1 to S-like transition is marked by the shedding of the flagellum, retraction of the pili,  
59 and production of a stalk at the same cell pole (Figure 1A).

60 In the swarmer cells, the master transcriptional regulator, CtrA, inhibits the DNA  
61 replication. The *Caulobacter* origin of replication,  $C_{ori}$ , is bound by CtrA, which prevents  
62 replisome formation in the swarmer cells (5). Concurrent with the swarmer to stalked  
63 cell transition, CtrA is degraded by proteolysis and thus facilitating the binding of DnaA,  
64 the replication initiator, to the  $C_{ori}$  triggering chromosome replication.(6). Apart from  
65 blocking DNA replication initiation, CtrA also serve as a transcription factor to drive the

66 expression of numerous developmentally important genes in a cell cycle dependent  
67 manner (7).

68         The differential activity of CtrA in swarmer and stalked cells is of paramount  
69 significance for generating different cell fates. Multiple levels of regulation involving  
70 control at the level of synthesis, stability, and activity exist for the regulation of CtrA  
71 during cell cycle (8,9). The phosphorylated form of CtrA (CtrA~P) represents the active  
72 form that binds to DNA (10). The phosphorylation of CtrA is catalyzed by an essential  
73 hybrid cell cycle histidine kinase/phosphatase, CckA, which phosphorylates CtrA  
74 through the single domain histidine phosphotransferase, ChpT (11-14). In the swarmer,  
75 and pre-divisional cells, the kinase activity of CckA ensures the abundance of active  
76 CtrA~P, while in the stalked cell compartment, the phosphatase activity of CckA is  
77 predominant ensuring the dephosphorylation, and degradation, of CtrA (Figures 1A and  
78 1B) (15). The bifunctional nature of CckA is governed by the second messenger, cyclic-  
79 di-guanylate (c-di-GMP). Binding of c-di-GMP to CckA causes an inhibition of its kinase  
80 activity and trigger the phosphatase activity. The swarmer to stalked cell transition is  
81 accompanied by an increase in the levels of c-di-GMP, which causes the transition of  
82 CckA from the kinase to the phosphatase mode (16,17).

83         Recent evidences have shown that in addition to developmental regulatory  
84 proteins such as CtrA, the cell cycle progression in *Caulobacter* is controlled by a  
85 cytoplasmic redox fluctuation (18). We have shown that a redox dependent regulator,  
86 NstA, whose activation is coupled to the cytoplasmic redox state, inhibits the DNA  
87 decatenation activity of topoisomerase IV (Topo IV) during the early stages of cell cycle  
88 (18). Apart from the cytoplasmic redox control of NstA activity, additional layers of

89 regulation for NstA exist at the level of transcription by the transcription factors, GcrA  
90 and CcrM, and at the level of protein abundance by the ClpXP protease. A stable  
91 version of NstA, NstADD, is resistant to protein degradation by ClpXP. Overproduction  
92 of NstADD from an inducible promoter induces lethality in *Caulobacter* (18). In this  
93 study, we wished to investigate the regulatory networks that possibly fine-tune NstA  
94 activity *in vivo*. Towards this, we exploited the lethality induced by NstADD, to conduct  
95 an unbiased forward genetic screen to analyze extragenic suppressor mutation(s) that  
96 can negate NstADD toxicity. Strikingly, through this screen we have identified  
97 suppressor mutations in *cckA* that influences the DNA binding activity of CtrA in a  
98 distinctive manner. We show that the CckA(L228P) mutation though enhances the  
99 CtrA~P levels, does not universally increase the binding of CtrA on a genome-wide  
100 scale. Rather, we found that the CckA(L228P) mutation specifically increases the  
101 binding of CtrA~P at the *C<sub>ori</sub>* and a very small sub-set of CtrA dependent promoters.  
102 Finally, we show that the enhanced binding of CtrA to the *C<sub>ori</sub>* rescues the toxicity  
103 caused by NstADD by possibly slowing down the chromosome replication process to  
104 compensate for the slowed down segregation caused by the inhibitory effects of  
105 NstADD on the Topo IV.

106

## 107 **Results**

### 108 **Suppressor mutations in CckA alleviate NstADD toxicity**

109 Overproduction of the cell-cycle stable form of the Topo IV inhibitor, NstADD,  
110 leads to fitness defect and impaired chromosome segregation in *Caulobacter* (18). To

111 unearth the signaling network that regulate NstA, we exploited the lethality induced by  
112 NstADD overproduction in a genetic screen to identify extragenic suppressors that could  
113 tolerate NstADD toxicity (See Materials and Methods). Strikingly, whole-genome  
114 sequencing revealed that all nine extragenic suppressors harbored a mutation in the  
115 gene encoding the cell cycle histidine kinase, *cckA* (Supplementary Figure S1C). The  
116 suppressor mutations were CckA-(L228P), (A317V), (D364G), (R356C), (F392L),  
117 (F493C) and (F496C) (Figure 1C, Supplementary Figures S1B, S2A and S2B).  
118 Interestingly, all the point mutations in *cckA*, except the L228P substitution, were  
119 located either in the histidine kinase domain or the ATP binding domain of the CckA  
120 protein (Supplementary Figure S1C). Remarkably the L228P mutation, which mapped  
121 to the PAS-B domain in CckA, rendered developmental defects such as cell  
122 filamentation in the *WT* and the  $\Delta nstA$  mutant (Figure 1D, Supplementary Figure S2A).  
123 To confirm that it is the L228P mutation in *cckA* that conferred resistance to NstADD  
124 toxicity, we backcrossed the *cckA*(L228P) mutation into *WT* and  $\Delta nstA$ . The  
125 backcrossed cells were indeed able to tolerate the NstADD overexpression  
126 (Supplementary Figure S1A). The fact that the CckA(L228P) mutation was not in the  
127 kinase or the ATP binding domain of CckA, prompted us to investigate further the  
128 mechanism by which the *cckA*(L228P) mutant induced the developmental defects and  
129 negated the chromosome segregation defect attributed by NstADD in *Caulobacter*.

### 130 **CckA(L228P) mutation leads to increased CtrA~P levels but not increase in CtrA** 131 **binding or activity**

132 The cell cycle histidine kinase, CckA, is the primary kinase that activates the  
133 master cell cycle transcriptional regulator, CtrA, by phosphorylation (10). The

134 phosphorylated form of CtrA (CtrA~P) binds efficiently to its target promoters on the  
135 chromosome regulating transcription (10,11,19). Therefore, we decided to investigate if  
136 the L228P mutation in the PAS-B domain of CckA could affect CtrA~P levels.  
137 Interestingly, *in vivo* phosphorylation analysis revealed that the relative levels of CtrA~P,  
138 compared to total CtrA, was two fold higher in the *cckA*(L228P) mutant than the wild  
139 type cells (Figure 2A).

140 It has been shown that increase in CtrA~P levels could result in elevated levels of  
141 CtrA binding to its target promoters (20,21). Therefore, we decided to analyze the  
142 binding of CtrA~P on well-established CtrA-dependent promoters such as *pilA*, *tacA* and  
143 *kidO* (22-24), by quantitative chromatin immunoprecipitation (qChIP) analysis using  
144 CtrA specific antibodies. Surprisingly, our qChIP experiments revealed that the binding  
145 of CtrA to the  $P_{pilA}$ ,  $P_{kidO}$  and  $P_{tacA}$  promoters were not significantly different in the  
146 *cckA*(L228P) mutant when compared to wild-type (Figure 2D, Supplementary Figure  
147 S3A, B). Further,  $\beta$ -galactosidase (LacZ)-based promoter-probe assays using the  
148 promoters of *pilA* and *tacA* in *WT*,  $\Delta nstA$  and  $\Delta nstA$  *cckA*(L228P) mutant backgrounds,  
149 revealed that there was no measurable differences in the  $P_{pilA}$  and  $P_{tacA}$  promoter  
150 activities in the *cckA*(L228P) mutant (Figures 2B and 2C).

151 Collectively, these results indicated that the *cckA*(L228P) mutation increased  
152 CtrA~P levels. Nevertheless, this surge in CtrA~P levels did not result in increased  
153 binding of CtrA, or elevated promoter activity, on at least the G1-specific promoters of  
154 CtrA such as  $P_{kidO}$ ,  $P_{pilA}$  and  $P_{tacA}$ . Furthermore, these observations opened up the  
155 possibility that CckA, apart from its kinase activity, may be influencing the DNA-binding  
156 activity of CtrA, only at specific promoter regions in the *Caulobacter* genome.

## 157 **CckA influences the promoter specific binding of CtrA**

158           Next we decided to investigate if the absence of difference in binding of CtrA,  
159 despite increased CtrA~P levels in the *cckA*(L228P) mutant, is specific to a subset of  
160 CtrA dependent promoters. Towards this, we performed chromatin immunoprecipitation  
161 followed by deep sequencing (ChIP-seq) to analyze the CtrA occupancy on its target  
162 promoters in the *cckA* and *cckA*(L228P) mutant backgrounds on a genome-wide scale.  
163 From the ChIP-seq analyses it was evident that the *cckA*(L228P) mutation enhanced  
164 the CtrA occupancy at the promoter regions of target genes whose transcripts peaked  
165 at late S-phase, including the Class II flagellar genes such as *pleA*, *fliQ*, *fliL*, *fliM*, *fliJ*  
166 and *fliI* (25), pilus secretion genes, *cpaA* and *cpaB* (26), flagellar regulatory genes, *flbT*  
167 and *flbA* (27), and the chemotaxis genes, *motA* and *motB* (28) (Figures 3 A, C ,D and  
168 Supplementary Dataset 1). To corroborate if this increase in binding of CtrA to these  
169 promoters resulted in an increased promoter activity, we analyzed the activity of the *fliM*  
170 promoter ( $P_{fliM}$ ) and the *flbT* promoter ( $P_{flbT}$ ) using LacZ reporter fusions to these  
171 promoters ( $P_{fliM}$ -*lacZ* and  $P_{flbT}$ -*lacZ*). Our analyses showed that indeed the activities of  
172  $P_{fliM}$  and  $P_{flbT}$  were increased in the *cckA*(L228P) mutant background commensurate  
173 with the increase in binding of CtrA to these promoters (Supplementary Figure S4A, B).  
174 Further, the qChIP experiments confirmed the enhanced binding of CtrA at the promoter  
175 region of *flbT*, in the  $\Delta nstA$  *cckA* (L228P) background when compared to the WT or  
176  $\Delta nstA$  (Supplementary Figure S3C).

177           Interestingly, in addition to the S-phase specific promoters, the ChIP-seq data  
178 also revealed a significant increase in binding of CtrA to the chromosomal origin of  
179 replication,  $C_{ori}$  (Figure 3B). The, qChIP experiment also confirmed the increase in CtrA



180 occupancy at the  $C_{ori}$ , in the *cckA*(L228P) mutant. In comparison to the *WT* or  $\Delta nstA$ , a  
181 three-fold increase in the binding of CtrA at  $C_{ori}$  was evident in the *cckA*(L228P) mutant  
182 background (Supplementary Figure S3D). Together, these data pointed towards the  
183 differential DNA binding of CtrA, as a result of the *cckA*(L228P) point mutation to S-  
184 phase specific target promoters, and  $C_{ori}$ , possibly regulated through the PAS-B domain  
185 of CckA.

186

### 187 **CtrA mediated repression of replication initiation mitigate NstA induced lethality**

188         Next, we wondered if the increase in the CtrA binding to the  $C_{ori}$  is what  
189 contributes to the rescue of the toxicity induced by the overproduction of stable NstADD.  
190 We hypothesized that the specific modulation of CtrA activity by the CckA(L228P)  
191 mutation leading to enhanced binding of CtrA to the  $C_{ori}$  may be delaying replication  
192 initiation. Further, this delay in replication initiation may be slowing down the  
193 chromosome cycle to compensate for a reduced activity of a downstream event in the  
194 chromosome cycle. For example, the slow down in segregation process by the  
195 reduction in the decatenation activity of Topo IV by NstADD (18). To test this  
196 hypothesis, we decided to monitor the appearance or movement of the newly replicated  
197 chromosomal origin in the *cckA*(L228P) mutant. In *Caulobacter*, it has been well  
198 demonstrated that the newly formed origin of replication is immediately tethered to the  
199 opposite pole upon initiation of replication (29). The chromosome partitioning protein,  
200 ParB, specifically binds to the regions near  $C_{ori}$  and moves along with the  $C_{ori}$  upon  
201 initiation of replication (30,31). Therefore, the movement of fluorescently tagged ParB,

202 GFP-ParB, can be used as a proxy to monitor the movement of the newly formed  $C_{ori}$  to  
203 the opposite cell pole (31,32). Localization experiments using GFP-ParB showed that  
204 the  $\Delta nstA$   $cckA(L228P)$  mutant had stalked cells with either single GFP-ParB foci  
205 (22.4%; Figure 4A red arrow heads, Figure 4C), or with two GFP-ParB foci, partially  
206 segregated, with the second foci still migrating to the opposite pole (33.8%; Figure 4A  
207 white arrow heads, Figure 4C). This was unlike in  $\Delta nstA$  cells wherein the newly  
208 replicated  $C_{ori}$  along with GFP-ParB was immediately tethered to the opposite pole upon  
209 initiation of replication (86.9%; Figures 4B and C). From this observation we inferred  
210 that in the  $cckA(L228P)$  mutant, the initiation of replication and the elongation processes  
211 of the chromosome was slowed. This slow down may well be due to the increase in  
212 CtrA binding to the  $C_{ori}$ . We also observed multiple GFP-ParB foci in *Caulobacter* cells,  
213 overproducing NstADD (Figure 4D), unlike the control samples with pMT335 vector  
214 alone, wherein, bipolar GFP-parB foci were predominant (Figure 4D). Thus we surmise  
215 that in the cells overproducing NstADD, multiple rounds of DNA replication are initiated  
216 and the chromosome decatenation is hampered (18). To counter this effect,  
217  $cckA(L228P)$  point mutation enhances the CtrA binding at the  $C_{ori}$ , which can  
218 significantly slow down the replication cycle. Our hypothesis was further corroborated by  
219 the observation that the increase in the binding of CtrA to the  $C_{ori}$  is still retained after  
220 the overexpression of NstADD. In comparison to the *WT* or  $\Delta nstA$ , overexpressing  
221 NstADD, the  $cckA(L228P)$  mutant cells overproducing NstADD, had a significant  
222 increase in the occupancy of CtrA at the  $C_{ori}$  (Figure 5B).

223         The CtrA binding boxes at the origin overlaps with the DnaA binding sites (6,33).  
224 Thus when CtrA~P is abundant in the system, the DnaA binding to the origin is inhibited

225 leading to inhibition of chromosome replication initiation (34). Therefore, we speculated  
226 that, if it is the increase in CtrA binding that is leading to slow down in replication, then  
227 such an inhibition should be relieved by titrating out CtrA at the  $C_{ori}$  by the  
228 overexpression of DnaA. Indeed, the overproduction of DnaA or its constitutively active  
229 ATP bound form, DnaA(R357A), from the xylose inducible promoter ( $P_{xyI}$ ) on a medium  
230 copy plasmid (35) caused a considerable decrease in cell filamentation of SN208 cells  
231 (Figure 5A). In addition, the qChIP experiments, also confirmed that the CtrA occupancy  
232 at  $C_{ori}$  was greatly reduced by about 70%, post the DnaA/DnaA(R357A) overexpression  
233 in the SN208 mutant (Figure 5C). Altogether, these results indicated at the increased  
234 binding of CtrA to  $C_{ori}$  facilitated by the *cckA*(L228P) mutation can alleviate toxicity  
235 attributed to NstADD overproduction.

236

## 237 **Discussion**

238 The highly conserved CckA-CtrA signal transduction pathway in  $\alpha$ -proteobacteria  
239 has several implications in development and pathogenesis. For example, during the  
240 early stages of symbiosis, in the nitrogen fixing bacteria, *Sinorhizobium meliloti* (*S.*  
241 *meliloti*), the role of CckA and its regulation has been shown to be essential (36).  
242 Likewise, the viability of the intracellular pathogen, *Brucella abortus* (*B. abortus*), in the  
243 human macrophages is dependent on the CckA-ChpT-CtrA pathway (37). The  
244 regulatory networks involving CtrA can be related to the specific lifestyle of the  
245 bacterium. For instance, while in *Caulobacter* CtrA is involved in cell-fate control, and  
246 cell cycle, by fine-tuning the stalked and swarmer cell programs, the control of cell

247 envelope composition by CtrA is prevalent in *B. abortus* and *Rhizobium leguminosarum*  
248 (38,39), reiterating the plasticity of CckA-CtrA pathway.

249 In this study, we shown that the L228P mutation in the PAS-B domain of CckA  
250 not only increases the CtrA~P levels but also rewires the preferential binding of CtrA to  
251 its target promoters (Figure 2A, 3 and Supplementary Dataset 1). The PAS-B domain in  
252 CckA has been shown to be necessary for regulation of its auto kinase activity, and for  
253 the switching of CckA between the kinase and the phosphatase modes (40). The CckA  
254 phosphatase activity during the swarmer to stalked cell transition is triggered by the  
255 binding of the effector molecule, c-di-GMP, to the PAS-B domain (16,17,40). Therefore,  
256 it is conceivable that the *cckA*(L228P) mutation possibly perturbs the binding of c-di-  
257 GMP to CckA thereby locking CckA in a kinase active form leading to increased CtrA~P  
258 levels in the *cckA*(L228P) mutant (Figure 6).

259 Surprisingly, the above-mentioned increase in the CtrA~P levels does not  
260 translate into a uniform increase in the binding of CtrA on all its target sites on the  
261 chromosome. The increased binding happens only at the *C<sub>ori</sub>* and a sub-set of S-phase  
262 specific CtrA promoters. Previous studies have shed light on the additional components,  
263 SciP and MucR, which modulate the activity of the CtrA-dependent promoters during  
264 cell cycle (41-43). While MucR specifically represses G1-phase promoters of CtrA, SciP  
265 has been shown to negatively regulate the CtrA-dependent promoters whose activity  
266 are known to peak at the S-phase of the cell cycle (42). Interestingly, our comparative  
267 ChIP-Seq analysis, revealed that the CckA(L228P) substitution contributes to specific  
268 enhancement of CtrA binding at S-phase promoters, which are also bound by SciP. The  
269 mechanistic mode of repressing the CtrA transcription by SciP involves a direct

270 interaction between SciP and CtrA (43). Interestingly, SciP does not perturb the DNA  
271 binding activity of CtrA and it blocks the RNA polymerase recruitment to the CtrA  
272 activated promoters (43). Moreover, SciP itself is under the direct transcriptional control  
273 of CtrA (41). Nevertheless, our ChIP-Seq analysis shows that in the *cckA*(L228P)  
274 mutant the binding of CtrA to the *sciP* promoter is not significantly altered  
275 (Supplementary Dataset 1) indicating that *sciP* transcription might not be altered in  
276 CckA(L228P). Therefore, it is tempting to speculate that the CckA(L228P) substitution  
277 possibly facilitates CtrA to overcome the inhibition imparted by SciP either by directly  
278 acting on SciP or by making CtrA more potent to compete for the RNA polymerase. It  
279 may also be possible that the CckA kinase could be regulating the interaction between  
280 SciP and CtrA, in a direct or indirect manner. However, this hypothesis, remains to be  
281 investigated further and our results pave way for exploring this intriguing aspect of the  
282 CckA-CtrA pathway.

283

## 284 **Materials and methods**

### 285 **Growth Conditions and Media**

286 *Caulobacter* strains were grown on rich PYE media (0.2% peptone, 0.1% yeast  
287 extract, 1 mM MgSO<sub>4</sub>, 0.5 mM CaCl<sub>2</sub>) or minimal M2G media (M2 -1X salt solution  
288 [Na<sub>2</sub>HPO<sub>4</sub> 0.87gm/L, KH<sub>2</sub>PO<sub>4</sub> 0.53gm/L, NH<sub>4</sub>Cl 0.25gm/L] supplemented with 0.5 mM  
289 MgSO<sub>4</sub>, 0.2 % Glucose, 10 μM FeSO<sub>4</sub>.EDTA, 0.5 mM CaCl<sub>2</sub>) (44), and incubated at  
290 29°C, unless specifically mentioned. The *Caulobacter* strains were subjected to  
291 electroporation, øCr30 mediated transductions, and intergeneric conjugations (using  
292 *E.coli* S17-1) as previously described (24,45,46). *E. coli* strains, EC100D (Epicentre,

293 WI, USA), and S17-1 were grown on LB media and incubated at 37°C, unless  
294 specifically mentioned.

295

### 296 **In vivo phosphorylation**

297 In vivo phosphorylation experiments were performed as described previously (47). A  
298 single colony of cells picked from a PYE agarose plate was washed with M5G medium  
299 lacking phosphate and was grown overnight in M5G with 0.05 mM phosphate to an  
300 optical density of 0.3 at 660 nm. One milliliter of culture was labeled for 4 min at 28°C  
301 using 30  $\mu\text{Ci}$  of  $\gamma$ -[ $^{32}\text{P}$ ]ATP. Upon lysis, proteins were immunoprecipitated with 3 ml of  
302 anti-CtrA antiserum and Protein A agarose (Roche, CH) and the precipitates were  
303 resolved by SDS–polyacrylamide gel electrophoresis and radiolabelled CtrA was  
304 quantified and were normalized to the relative cellular content as determined by  
305 immunoblotting of lysates.

306

### 307 **Extragenic suppressor Screen**

308  $\Delta nstA$  or *WT* cells were UV irradiated with 700 and 900 $\times$ 100  $\mu\text{J}/\text{cm}^2$  energy using  
309 CL 1000 UV Cross linker (UVP, Cambridge, UK). The irradiated cells were diluted into  
310 PYE media followed by 6 hr incubation. The cells were then electroporated with plasmid  
311 pMT335- $P_{van}$ -*nstADD* and plated on PYE supplemented with gentamycin and vanillate  
312 inducer. Individual colonies were then grown in liquid PYE containing gentamycin, and  
313 vanillate inducer for overnight. Two criteria were used for confirming the extragenic  
314 mutation: (i) plasmids from the selected mutants were again transformed into *WT*

315 *Caulobacter* and checked for *nstA* toxicity, to avoid the possibility that the suppression  
316 is due to mutation on the plasmid, and (ii) plasmid cured mutants were retransformed  
317 with fresh pMT335-P<sub>van</sub>-*nstADD*, to confirm that the toxicity suppression is indeed due to  
318 a mutation in the chromosome. Mutations were mapped by next generation sequencing  
319 on an Illumina platform at Fasteris, Switzerland.

320

### 321 **Chromatin immunoprecipitation (ChIP)**

322 ChIP experiments were carried out as described earlier (24). Mid-log phase cells  
323 were cross-linked in 10 mM sodium phosphate (pH 7.6) and 1% formaldehyde at room  
324 temperature for 10 minutes and on ice for 30 min thereafter, washed thrice in phosphate  
325 buffered saline (pH 7.4) and lysed in 5000 Units of Ready-Lyse lysozyme solution  
326 (Epicentre Technologies, WI, USA). Lysates were sonicated on ice using 7 bursts of 30  
327 sec to shear DNA fragments to an average length of 0.3-0.5 kbp. The cell debris were  
328 cleared by centrifugation at 14,000 rpm for 2 min at 4°C. Lysates were normalized by  
329 protein content, diluted to 1 mL using ChIP buffer (0.01% SDS, 1.1% Triton X-100, 1.2  
330 mM EDTA, 16.7 mM Tris-HCl [pH 8.1], 167 mM NaCl plus protease inhibitors  
331 [Complete<sup>TM</sup> EDTA-free, Roche, Switzerland]), and pre-cleared with 80 µl of protein-  
332 A agarose (Roche, Switzerland) saturated with 100 µg BSA and 300 µg Salmon sperm  
333 DNA. Ten % of the supernatant was removed and used as total chromatin input  
334 DNA. To the remaining supernatant, anti-CtrA (20) antibody was added (1:500 dilution),  
335 and incubated overnight at 4°C. Immuno complexes were trapped with 80 µL of protein-  
336 A agarose beads pre-saturated with BSA-salmon sperm DNA. The beads were then  
337 washed once each with low salt buffer (0.1% SDS, 1% Triton X- 100, 2 mM EDTA, 20

338 mM Tris-HCl [pH 8.1], 150 mM NaCl), high salt buffer (0.1% SDS, 1% Triton X-100, 2  
339 mM EDTA, 20 mM Tris-HCl [pH 8.1], 500 mM NaCl) and LiCl buffer (25 mM LiCl,  
340 1% NP-40, 1% sodium deoxycholate, 1 mM EDTA, 10 mM Tris-HCl [pH 8.1]), and twice  
341 with TE buffer (10 mM Tris-HCl [pH 8.1], 1 mM EDTA). The protein•DNA complexes  
342 were eluted in 500  $\mu$ L freshly prepared elution reagent (1% SDS, 1 mM NaHCO<sub>3</sub>). This  
343 was supplemented with NaCl to a final concentration of 300 mM and incubated  
344 overnight at 65°C to reverse the crosslinks. The samples were treated with 2  $\mu$ g of  
345 Proteinase K (Roche, Switzerland) for 2 hr at 45°C in after addition of 40 mM EDTA and  
346 40 mM Tris-HCl (pH 6.5). DNA was extracted using phenol:chloroform:isoamyl alcohol  
347 (25:24:1), ethanol-precipitated using 20  $\mu$ g of glycogen as carrier, and resuspended in  
348 50  $\mu$ L of sterile deionized water. The comparative ChIP-followed by deep Sequencing  
349 (ChIP-Seq), was done using the next generation sequencing on an Illumina platform at  
350 Fasteris, Switzerland.

351

### 352 **Quantitative PCR (qPCR) analyses**

353 qPCR was performed on a CFX96 Real Time PCR System (Bio-Rad, CA, USA) using  
354 10% of each ChIP sample, 12.5  $\mu$ L of SYBR<sup>®</sup> green PCR master mix (Bio-Rad, CA,  
355 USA), 200 nM of primers and 6.5  $\mu$ L of water per reaction. Standard curve generated  
356 from the cycle threshold (Ct) value of the serially diluted chromatin input was used to  
357 calculate the % input value of each sample. Average values are from triplicate  
358 measurements done per culture. The final data was generated from three independent  
359 cultures. The SEM shown in the figures was derived with Origin 7.5 software (OriginLab  
360 Corporation, Northhampton, MA, USA). *C<sub>ori</sub>\_Fwd* (5'-CGCGGAACGACCCACAAACT-3')



361 and  $C_{ori\_Rev}$  (5'-CAGCCGACCGACCAGAGCCA-3') primer pairs as described earlier  
362 (35) were used to amplify the region near *ori* precipitated by anti-CtrA antibody. To  
363 check CtrA binding on  $P_{pilA}$ , the DNA region analysed by real time PCR was from  
364 nucleotide -287 to -91 relative to the start codon of *pilA* (24). A  $P_{kidO}$  fragment  
365 comprising nt 3,857,810–3,858,141 of the NA1000 genome sequence was quantified  
366 (23) to monitor CtrA binding on  $P_{kidO}$ . To quantify CtrA occupancy at the promoter of  
367 *flbT*, the DNA region, -280 to +30 relative to the start codon of *flbT*, was used. The DNA  
368 region from -226 to +30 relative to the start codon of *tacA* was analysed for quantifying  
369 CtrA occupancy on  $P_{tacA}$  (24).

370

### 371 **ChIP-seq data analysis**

372 The FASTQ files were checked for quality of sequencing using FastQC software,  
373 version 0.11.5. The first ten bases showed distortion, due to which it was decided to trim  
374 the first ten bases from all short reads. The reads were trimmed at the 5' end for 10  
375 bases using *fastx\_trimmer* tool from *Fastx-toolkit* version 0.0.14. The preprocessed  
376 reads were mapped to the *Caulobacter Crescentus* NA1000 reference genome  
377 (CP001340.1) using aligner *Bowtie* version 1.0.0 using the following parameter: -m 1, -  
378 S, -v 2. Around 36.9 million reads mapped uniquely to the reference genome for the wild  
379 type *cckA* and 21 million reads for the mutant *cckA(L228P)* strains.

380 Further, the aligned reads were imported onto *Seqmonk* (version 1.38.1) to build the  
381 sequence read profiles. The genome was subdivided into 50bp probes and a value  
382 representing the number of reads mapping to the genome within a probe was calculated  
383 using the Read Count Quantitation option. The probe list with the quantified value for

384 each probe was exported. Custom Perl scripts were used to compute the relative  
385 abundance of each probe as a percent with respect to the total uniquely mapped reads  
386 for each dataset. A cutoff was determined as average reads plus twice the standard  
387 deviation of the sample to differentiate between candidate peaks and background noise.  
388 The candidate peaks were annotated using custom Perl scripts. A probe was annotated  
389 with a gene if the centre of the probe was within a distance of -500 and +100 bases  
390 from the transcription start site of the gene, taking into account the orientation of the  
391 gene as well. If a probe is found to satisfy the condition for two genes (each on either  
392 strand), then both the genes are reported. A list of nearby RNA genes are also reported  
393 separately. Probes without an annotation are labeled as 'NO ANNO'.

394

## 395 **Microscopy**

396 Differential interference contrast (DIC) and fluorescence microscopy were  
397 performed on a Nikon Eclipse 90i microscope equipped with 100X oil TIRF (1.49  
398 numerical aperture) objective and a coolSNAP HQ-2 (Photometrics, USA) CCD camera.  
399 Cells were placed on a 1% agarose solidified pads for imaging. Images were processed  
400 and analyzed with the Metamorph software (Molecular Devices, USA).

401

## 402 **$\beta$ -Galactosidase Assay**

403 The cultures harbouring were incubated at 29°C till it reached 0.1-0.4 OD@660  
404 nm ( $A_{660}$ ). 50  $\mu$ l of the cells were treated with a 10  $\mu$ l of chloroform followed by the

405 addition of 750  $\mu$ l of Z-buffer (60 mM  $\text{Na}_2\text{HPO}_4$ , 40 mM  $\text{NaH}_2\text{PO}_4$ , 10 mM KCl, 1mM  
406  $\text{MgSO}_4 \cdot 7\text{H}_2\text{O}$ , pH 7.0) followed by 200  $\mu$ l of Ortho Nitro Phenyl- $\beta$ -D-Galactoside (from  
407 stock concentration of 4 mg/ml dissolved in 100 mM potassium phosphate buffer [pH  
408 7.0]). The reaction mixture was incubated at 30°C till yellow color was developed.  
409 Finally 500 $\mu$ l of 1 M  $\text{Na}_2\text{CO}_3$  solution was added to stop the reaction and absorbance at  
410 420nm ( $A_{420}$ ) of the supernatant was noted using Z-buffer as the blank. The miller units  
411 (U) were calculated using the equation  $U = (A_{420} \times 1000) / (A_{660} \times t \times v)$ , where 't' is the  
412 incubation time (min), 'v' is the volume of culture taken (ml). Experimental values were  
413 average of three independent experiments. The SEM shown in the figures was derived  
414 with Origin 7.5 software (OriginLab Corporation, Northampton, MA, USA).

415

## 416 **Acknowledgements**

417 We thank Justine Collier and Patrick Viollier for materials, Rashmi Sukumaran for  
418 her assistance with the ChIP-seq analysis, and Srinivasa Murty Srinivasula for  
419 discussions and critical comments on the manuscript. S.N. is supported by a graduate  
420 fellowship from IISER Thiruvananthapuram. L.K is supported by a Junior Research  
421 Fellowship from the Council of Scientific & Industrial Research (CSIR) India. This work  
422 was supported by funds from the Wellcome Trust-DBT India Alliance (500140/Z/09/Z)  
423 through an Intermediate fellowship to S.K.R., and funds from the SwarnaJayanti  
424 Fellowship (DST/SJF/LSA-01) from Department of Science and Technology, India, to  
425 S.K.R.

426

## 427 References

- 428 1. Skerker, J.M. and Berg, H.C. (2001) Direct observation of extension and  
429 retraction of type IV pili. *Proc Natl Acad Sci U S A*, **98**, 6901-6904.
- 430 2. Curtis, P.D. and Brun, Y.V. (2010) Getting in the loop: regulation of development  
431 in *Caulobacter crescentus*. *Microbiol Mol Biol Rev*, **74**, 13-41.
- 432 3. Skerker, J.M. and Laub, M.T. (2004) Cell-cycle progression and the generation of  
433 asymmetry in *Caulobacter crescentus*. *Nat Rev Microbiol*, **2**, 325-337.
- 434 4. Jenal, U. (2000) Signal transduction mechanisms in *Caulobacter crescentus*  
435 development and cell cycle control. *FEMS Microbiol Rev*, **24**, 177-191.
- 436 5. Taylor, J.A., Ouimet, M.C., Wargachuk, R. and Marczyński, G.T. (2011) The  
437 *Caulobacter crescentus* chromosome replication origin evolved two classes of  
438 weak DnaA binding sites. *Mol Microbiol*, **82**, 312-326.
- 439 6. Marczyński, G.T. and Shapiro, L. (2002) Control of chromosome replication in  
440 *caulobacter crescentus*. *Annu Rev Microbiol*, **56**, 625-656.
- 441 7. Laub, M.T., Chen, S.L., Shapiro, L. and McAdams, H.H. (2002) Genes directly  
442 controlled by CtrA, a master regulator of the *Caulobacter* cell cycle. *Proc Natl*  
443 *Acad Sci U S A*, **99**, 4632-4637.
- 444 8. Ryan, K.R., Judd, E.M. and Shapiro, L. (2002) The CtrA response regulator  
445 essential for *Caulobacter crescentus* cell-cycle progression requires a bipartite  
446 degradation signal for temporally controlled proteolysis. *J Mol Biol*, **324**, 443-455.
- 447 9. Ausmees, N. and Jacobs-Wagner, C. (2003) Spatial and temporal control of  
448 differentiation and cell cycle progression in *Caulobacter crescentus*. *Annu Rev*  
449 *Microbiol*, **57**, 225-247.
- 450 10. Jacobs, C., Ausmees, N., Cordwell, S.J., Shapiro, L. and Laub, M.T. (2003)  
451 Functions of the CckA histidine kinase in *Caulobacter* cell cycle control. *Mol*  
452 *Microbiol*, **47**, 1279-1290.
- 453 11. Biondi, E.G., Reisinger, S.J., Skerker, J.M., Arif, M., Perchuk, B.S., Ryan, K.R.  
454 and Laub, M.T. (2006) Regulation of the bacterial cell cycle by an integrated  
455 genetic circuit. *Nature*, **444**, 899-904.
- 456 12. Angelastro, P.S., Sliusarenko, O. and Jacobs-Wagner, C. (2010) Polar  
457 localization of the CckA histidine kinase and cell cycle periodicity of the essential  
458 master regulator CtrA in *Caulobacter crescentus*. *J Bacteriol*, **192**, 539-552.
- 459 13. Iniesta, A.A. and Shapiro, L. (2008) A bacterial control circuit integrates polar  
460 localization and proteolysis of key regulatory proteins with a phospho-signaling  
461 cascade. *Proc Natl Acad Sci U S A*, **105**, 16602-16607.
- 462 14. Jacobs, C., Domian, I.J., Maddock, J.R. and Shapiro, L. (1999) Cell cycle-  
463 dependent polar localization of an essential bacterial histidine kinase that  
464 controls DNA replication and cell division. *Cell*, **97**, 111-120.
- 465 15. Chen, Y.E., Tsokos, C.G., Biondi, E.G., Perchuk, B.S. and Laub, M.T. (2009)  
466 Dynamics of two Phosphorelays controlling cell cycle progression in *Caulobacter*  
467 *crescentus*. *J Bacteriol*, **191**, 7417-7429.
- 468 16. Lori, C., Ozaki, S., Steiner, S., Bohm, R., Abel, S., Dubey, B.N., Schirmer, T.,  
469 Hiller, S. and Jenal, U. (2015) Cyclic di-GMP acts as a cell cycle oscillator to  
470 drive chromosome replication. *Nature*, **523**, 236-239.

- 471 17. Dubey, B.N., Lori, C., Ozaki, S., Fucile, G., Plaza-Menacho, I., Jenal, U. and  
472 Schirmer, T. (2016) Cyclic di-GMP mediates a histidine kinase/phosphatase  
473 switch by noncovalent domain cross-linking. *Science Advances*, **2**, e1600823.
- 474 18. Narayanan, S., Janakiraman, B., Kumar, L. and Radhakrishnan, S.K. (2015) A  
475 cell cycle-controlled redox switch regulates the topoisomerase IV activity. *Genes*  
476 *Dev*, **29**, 1175-1187.
- 477 19. Pierce, D.L., O'Donnol, D.S., Allen, R.C., Javens, J.W., Quardokus, E.M. and  
478 Brun, Y.V. (2006) Mutations in DivL and CckA rescue a divJ null mutant of  
479 *Caulobacter crescentus* by reducing the activity of CtrA. *J Bacteriol*, **188**, 2473-  
480 2482.
- 481 20. Domian, I.J., Quon, K.C. and Shapiro, L. (1997) Cell type-specific  
482 phosphorylation and proteolysis of a transcriptional regulator controls the G1-to-S  
483 transition in a bacterial cell cycle. *Cell*, **90**, 415-424.
- 484 21. Spencer, W., Siam, R., Ouimet, M.C., Bastedo, D.P. and Marczynski, G.T. (2009)  
485 CtrA, a global response regulator, uses a distinct second category of weak DNA  
486 binding sites for cell cycle transcription control in *Caulobacter crescentus*. *J*  
487 *Bacteriol*, **191**, 5458-5470.
- 488 22. Chen, J.C., Hottes, A.K., McAdams, H.H., McGrath, P.T., Viollier, P.H. and  
489 Shapiro, L. (2006) Cytokinesis signals truncation of the PodJ polarity factor by a  
490 cell cycle-regulated protease. *Embo J*, **25**, 377-386.
- 491 23. Radhakrishnan, S.K., Pritchard, S. and Viollier, P.H. (2010) Coupling prokaryotic  
492 cell fate and division control with a bifunctional and oscillating oxidoreductase  
493 homolog. *Dev Cell*, **18**, 90-101.
- 494 24. Radhakrishnan, S.K., Thanbichler, M. and Viollier, P.H. (2008) The dynamic  
495 interplay between a cell fate determinant and a lysozyme homolog drives the  
496 asymmetric division cycle of *Caulobacter crescentus*. *Genes Dev*, **22**, 212-225.
- 497 25. Boyd, C.H. and Gober, J.W. (2001) Temporal regulation of genes encoding the  
498 flagellar proximal rod in *Caulobacter crescentus*. *J Bacteriol*, **183**, 725-735.
- 499 26. Skerker, J.M. and Shapiro, L. (2000) Identification and cell cycle control of a  
500 novel pilus system in *Caulobacter crescentus*. *Embo J*, **19**, 3223-3234.
- 501 27. Schoenlein, P.V., Gallman, L.S. and Ely, B. (1989) Organization of the flaFG  
502 gene cluster and identification of two additional genes involved in flagellum  
503 biogenesis in *Caulobacter crescentus*. *J Bacteriol*, **171**, 1544-1553.
- 504 28. Johnson, R.C. and Ely, B. (1979) Analysis of nonmotile mutants of the dimorphic  
505 bacterium *Caulobacter crescentus*. *J Bacteriol*, **137**, 627-634.
- 506 29. Shebelut, C.W., Guberman, J.M., van Teeffelen, S., Yakhnina, A.A. and Gitai, Z.  
507 (2010) *Caulobacter* chromosome segregation is an ordered multistep process.  
508 *Proceedings of the National Academy of Sciences of the United States of*  
509 *America*, **107**, 14194-14198.
- 510 30. Mohl, D.A. and Gober, J.W. (1997) Cell cycle-dependent polar localization of  
511 chromosome partitioning proteins in *Caulobacter crescentus*. *Cell*, **88**, 675-684.
- 512 31. Thanbichler, M. and Shapiro, L. (2008) Getting organized--how bacterial cells  
513 move proteins and DNA. *Nat Rev Microbiol*, **6**, 28-40.
- 514 32. Mohl, D.A., Easter, J., Jr. and Gober, J.W. (2001) The chromosome partitioning  
515 protein, ParB, is required for cytokinesis in *Caulobacter crescentus*. *Mol*  
516 *Microbiol*, **42**, 741-755.

- 517 33. Siam, R., Brassinga, A.K. and Marczyński, G.T. (2003) A dual binding site for  
518 integration host factor and the response regulator CtrA inside the *Caulobacter*  
519 *crescentus* replication origin. *J Bacteriol*, **185**, 5563-5572.
- 520 34. Shaheen, S.M., Ouimet, M.C. and Marczyński, G.T. (2009) Comparative analysis  
521 of *Caulobacter* chromosome replication origins. *Microbiology*, **155**, 1215-1225.
- 522 35. Fernandez-Fernandez, C., Gonzalez, D. and Collier, J. (2011) Regulation of the  
523 activity of the dual-function DnaA protein in *Caulobacter crescentus*. *PLoS One*,  
524 **6**, e26028.
- 525 36. Pini, F., Frage, B., Ferri, L., De Nisco, N.J., Mohapatra, S.S., Taddei, L.,  
526 Fioravanti, A., Dewitte, F., Galardini, M., Brilli, M. *et al.* (2013) The DivJ, CbrA  
527 and PleC system controls DivK phosphorylation and symbiosis in *Sinorhizobium*  
528 *meliloti*. *Mol Microbiol*, **90**, 54-71.
- 529 37. Willett, J.W., Herrou, J., Briegel, A., Rotskoff, G. and Crosson, S. (2015)  
530 Structural asymmetry in a conserved signaling system that regulates division,  
531 replication, and virulence of an intracellular pathogen. *Proc Natl Acad Sci U S A*,  
532 **112**, E3709-3718.
- 533 38. Francis, N., Poncin, K., Fioravanti, A., Vassen, V., Willemart, K., Ong, T.A.,  
534 Rappez, L., Letesson, J.J., Biondi, E.G. and De Bolle, X. (2017) CtrA controls cell  
535 division and outer membrane composition of the pathogen *Brucella abortus*. *Mol*  
536 *Microbiol*, **103**, 780-797.
- 537 39. Vanderlinde, E.M. and Yost, C.K. (2012) Mutation of the sensor kinase *chvG* in  
538 *Rhizobium leguminosarum* negatively impacts cellular metabolism, outer  
539 membrane stability, and symbiosis. *J Bacteriol*, **194**, 768-777.
- 540 40. Mann, T.H., Seth Childers, W., Blair, J.A., Eckart, M.R. and Shapiro, L. (2016) A  
541 cell cycle kinase with tandem sensory PAS domains integrates cell fate cues. *Nat*  
542 *Commun*, **7**, 11454.
- 543 41. Tan, M.H., Kozdon, J.B., Shen, X., Shapiro, L. and McAdams, H.H. (2010) An  
544 essential transcription factor, SciP, enhances robustness of *Caulobacter* cell  
545 cycle regulation. *Proc Natl Acad Sci U S A*, **107**, 18985-18990.
- 546 42. Fumeaux, C., Radhakrishnan, S.K., Ardisson, S., Theraulaz, L., Frandi, A.,  
547 Martins, D., Nesper, J., Abel, S., Jenal, U. and Viollier, P.H. (2014) Cell cycle  
548 transition from S-phase to G1 in *Caulobacter* is mediated by ancestral virulence  
549 regulators. *Nat Commun*, **5**, 4081.
- 550 43. Gora, K.G., Tsokos, C.G., Chen, Y.E., Srinivasan, B.S., Perchuk, B.S. and Laub,  
551 M.T. (2010) A cell-type-specific protein-protein interaction modulates  
552 transcriptional activity of a master regulator in *Caulobacter crescentus*. *Mol Cell*,  
553 **39**, 455-467.
- 554 44. Ely, B. (1991) Genetics of *Caulobacter crescentus*. *Methods Enzymol*, **204**, 372-  
555 384.
- 556 45. Chen, J.C., Viollier, P.H. and Shapiro, L. (2005) A membrane metalloprotease  
557 participates in the sequential degradation of a *Caulobacter* polarity determinant.  
558 *Mol Microbiol*, **55**, 1085-1103.
- 559 46. Poindexter, J.S. (1964) Biological Properties and Classification of the  
560 *Caulobacter* Group. *Bacteriol Rev*, **28**, 231-295.

561 47. Janakiraman, B., Mignolet, J., Narayanan, S., Viollier, P.H. and Radhakrishnan,  
562 S.K. (2016) In-phase oscillation of global regulons is orchestrated by a pole-  
563 specific organizer. **113**, 12550-12555.

564

## 565 **Figure legends**

566 **Figure 1. Cell cycle regulation in *Caulobacter crescentus* by the CckA-CtrA**  
567 **pathway.** (A) Schematic representation of the dual switching of CckA between kinase  
568 mode (blue) and phosphatase mode (orange) in the swarmer and stalked cell  
569 compartments, respectively. The graded bars indicate the time during which CtrA  
570 (black) is present during the cell cycle. (B) The bidirectional flow of phosphate between  
571 CckA, ChpT and CtrA. In the swarmer cells, CckA transfers the phosphate group to the  
572 phosphotransferase, ChpT, which further donate phosphate group to CtrA. Thus, the  
573 phosphorylated form of CtrA (CtrA~P) represent the active form, wherein CtrA can bind  
574 to various target promoters of several cell regulated genes, as well as repress the  
575 initiation of chromosome replication. (C) Growth of  $\Delta nstA$ , and the suppressor mutant,  
576  $\Delta nstA cckA(L228P)$ , upon *nstADD* overexpression. Cells, as indicated, were diluted five  
577 folds and spotted on media containing 0.5 mM vanillate. (D) Differential interference  
578 contrast (DIC) image of the suppressor mutant,  $\Delta nstA cckA(L228P)$ . Scale bar: 2 $\mu$ m.

579

580 **Figure 2. Effect of CckA(L228P) mutation on CtrA.** (A) *In vivo* phosphorylation  
581 experiment denoting CtrA~P/CtrA levels in *WT* and  $\Delta nstA cckA(L228P)$  mutants. The  
582 relative  $\beta$ -galactosidase activity (in percentage) of (B) the  $P_{tacA}$ -*lacZ* and (C) the  $P_{pilA}$ -  
583 *lacZ* reporters in *WT*,  $\Delta nstA$  and  $\Delta nstA cckA(L228P)$  cells. (D) Data of qChIP analysis  
584 showing the CtrA occupancy at the promoter region of *pilA* ( $P_{pilA}$ ) in *WT*,  $\Delta nstA$  and

585  $\Delta nstA$  *cckA*(L228P) cells. The values  $\pm$ SE, represented in A, B, C and D are the average  
586 of at least three independent experiments.

587

588 **Figure 3. The CckA(L228P) mutation leads to differential CtrA binding. (A)**

589 Genome-wide comparative ChIP-Seq using polyclonal antibodies to CtrA, denoting the  
590 occupancy of CtrA on the chromatin of *cckA* vs  $\Delta nstA$  *cckA*(L228P) mutant cells. The  
591 color key indicate the degree by which the occupancy of CtrA is varied in selected  
592 targets, as a result of the CckA(L228P) substitution. The color key at the bottom is  
593 expressed as  $\log_2$  ratio (see the Supplementary data set for the complete list of target  
594 genes). Traces of the occupancy of CtrA at (B) the chromosomal origin of replication,  
595  $C_{ori}$  (C) the promoter of *fliQ* (D) the promoter of *flbT*. The Figures 3B-D were derived  
596 from the ChIP-Seq data and the traces of CtrA in *WT* are denoted in green, and in  
597  $\Delta nstA$  *cckA*(L228P) mutant is denoted in orange.

598

599 **Figure 4. Suppression of NstADD toxicity by the *cckA*(L228P) mutant. (A)**

600 DIC and fluorescent micrographs of the extragenic suppressor mutant,  $\Delta nstA$   
601 *cckA*(L228P), harboring *gfp-parB* at the chromosomal *xyiX* locus (*xyiX::P<sub>xyi</sub>-gfp-parB*).  
602 Red arrow-heads: cells with one GFP-ParB foci; white arrow-heads: cells with two  
603 partially segregated GFP-ParB foci. (B) DIC and fluorescent micrographs of  $\Delta nstA$  cells  
604 expressing *gfp-parB* from *xyiX::P<sub>xyi</sub>-gfp-parB*. The cells were treated in the same  
605 manner, as described in A. (C) Data representing the stalked cells with one (blue), two  
606 partially segregated (orange), normal bipolar (yellow), and multiple (grey) GFP-ParB foci



607 in  $\Delta nstA$  *cckA*(L228P) (data from 1032 stalked cells) or  $\Delta nstA$  (data from 944 stalked  
608 cells). (D) DIC and fluorescent micrographs of *WT* cells harboring *xylX::P<sub>xyI</sub>-gfp-parB*,  
609 and overexpressing NstADD from *P<sub>van</sub>* on pMT335 or carrying the vector alone. The  
610 cells in (A), (B) and (D) were treated with 0.3% xylose to induce the production of GFP-  
611 ParB. Cells in (D) were additionally treated with 0.5 mM vanillate for 3h to induce  
612 NstADD production. Scale bar in A,B and D: 2 $\mu$ m.

613

614 **Figure 5. DnaA overexpression can alleviate the filamentation phenotype**  
615 **induced by the CckA(L228P).** (A) DIC images showing  $\Delta nstA$  *cckA*(L228P) harboring  
616 the vector or expressing *dnaA* or *dnaA*(R357A) from xylose inducible promoter on the  
617 medium copy vector, pJS 14. The cells were grown to exponential phase in PYE  
618 supplemented with 0.2% glucose, prior to the addition of 0.3% xylose. The xylose  
619 induction was done for 6h. (B) qChIP data depicting the CtrA occupancy at *C<sub>ori</sub>* in *WT*,  
620  $\Delta nstA$ , and  $\Delta nstA$  *cckA*(L228P) genetic backgrounds, after the overexpression of  
621 NstADD for three hours with 0.5mM vanillate inducer. (C) The qChIP data showing the  
622 CtrA occupancy at *C<sub>ori</sub>* in  $\Delta nstA$  *cckA*(L228P) cells, after the overexpression of DnaA or  
623 DnaA(R357A) from pJS14. The cells were treated in the same manner, as described in  
624 (A). The values $\pm$ SE, represented in (B) and (C) are the average of at least three  
625 independent experiments.

626

627 **Figure 6. Model for CckA(L228P) function.** (A) The membrane bound bi-  
628 functional kinase/phosphatase CckA (yellow), in its kinase form, phosphorylates CtrA

629 (orange), via the intermediate phosphotransferase, ChpT (green). The active  
630 phosphorylated form of CtrA (CtrA~P) binds to the DNA and triggers the transcription  
631 during G1- and late S-phase of the cell cycle, and inhibits chromosome replication in the  
632 G1 cells by binding to  $C_{ori}$ . When the phosphatase activity of CckA is predominant (See  
633 Fig. 1A), the phosphate flow reverses dephosphorylating and inactivating CtrA. (B) The  
634 CckA(L228P) mutation possibly leads to a predominant CckA kinase activity thereby  
635 increasing CtrA~P levels. In addition, the CckA(L228P) mutation, through an yet to be  
636 understood mechanism, specifically increases the CtrA~P binding at  $C_{ori}$  and S-phase  
637 specific promoters.

638

# Narayanan et al. Figure 1

bioRxiv preprint doi: <https://doi.org/10.1101/300178>; this version posted April 14, 2018. The copyright holder for this preprint (which was not certified by peer review) is the author/funder. All rights reserved. No reuse allowed without permission.

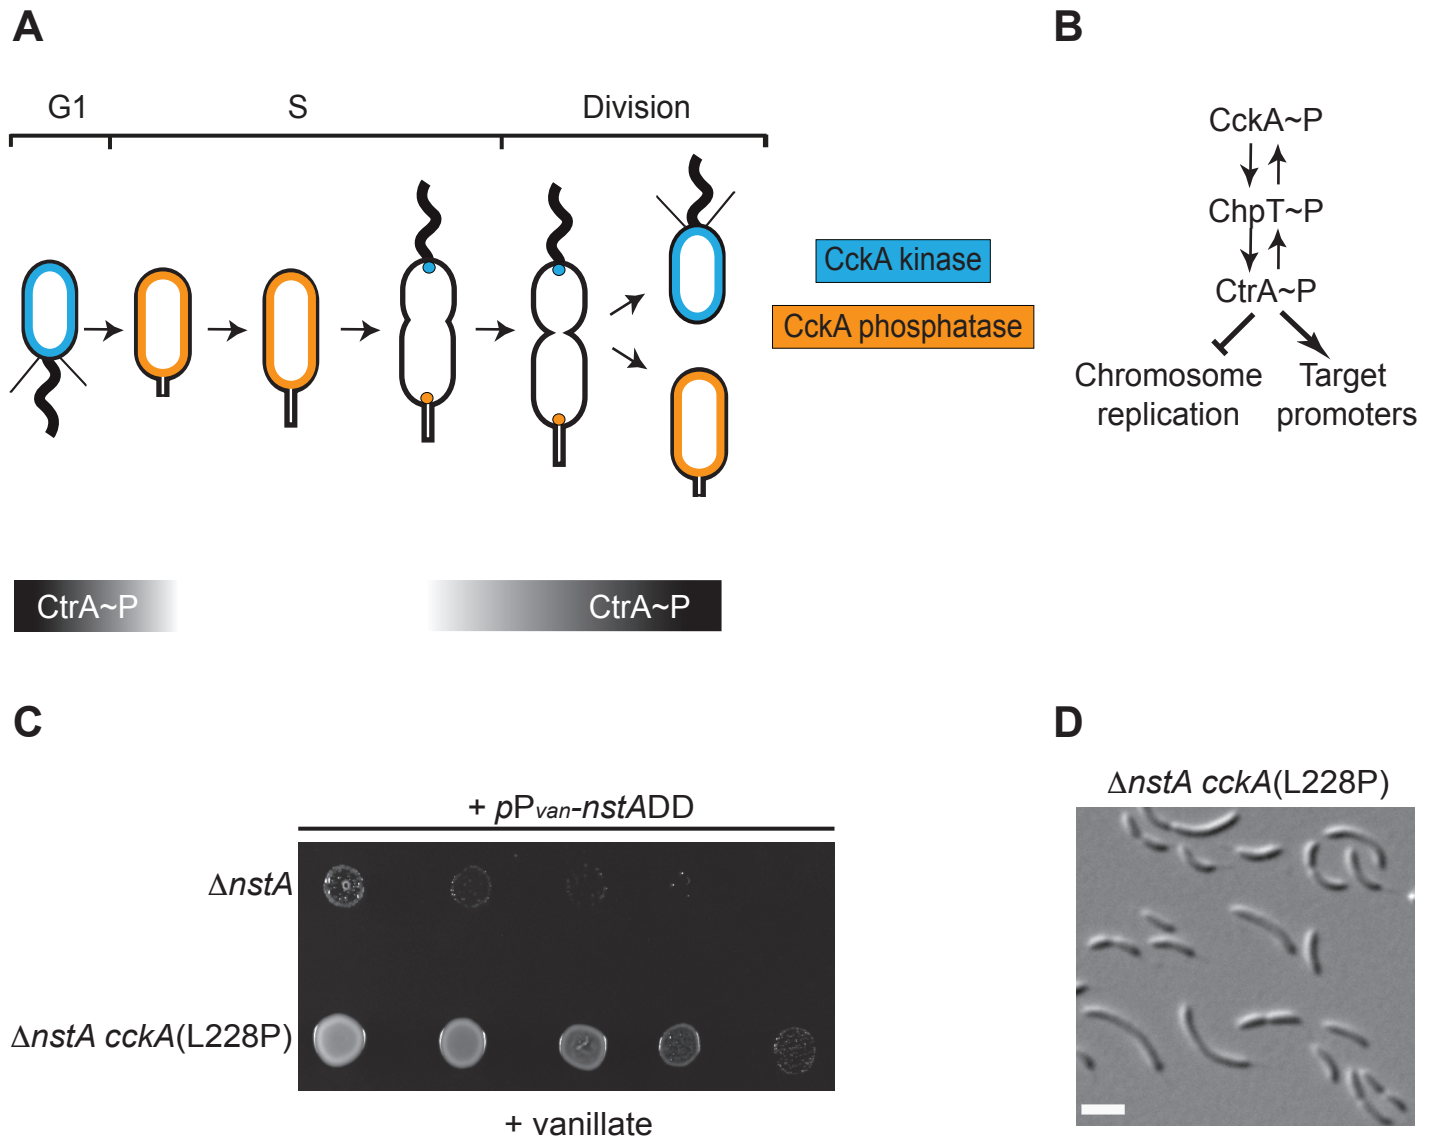

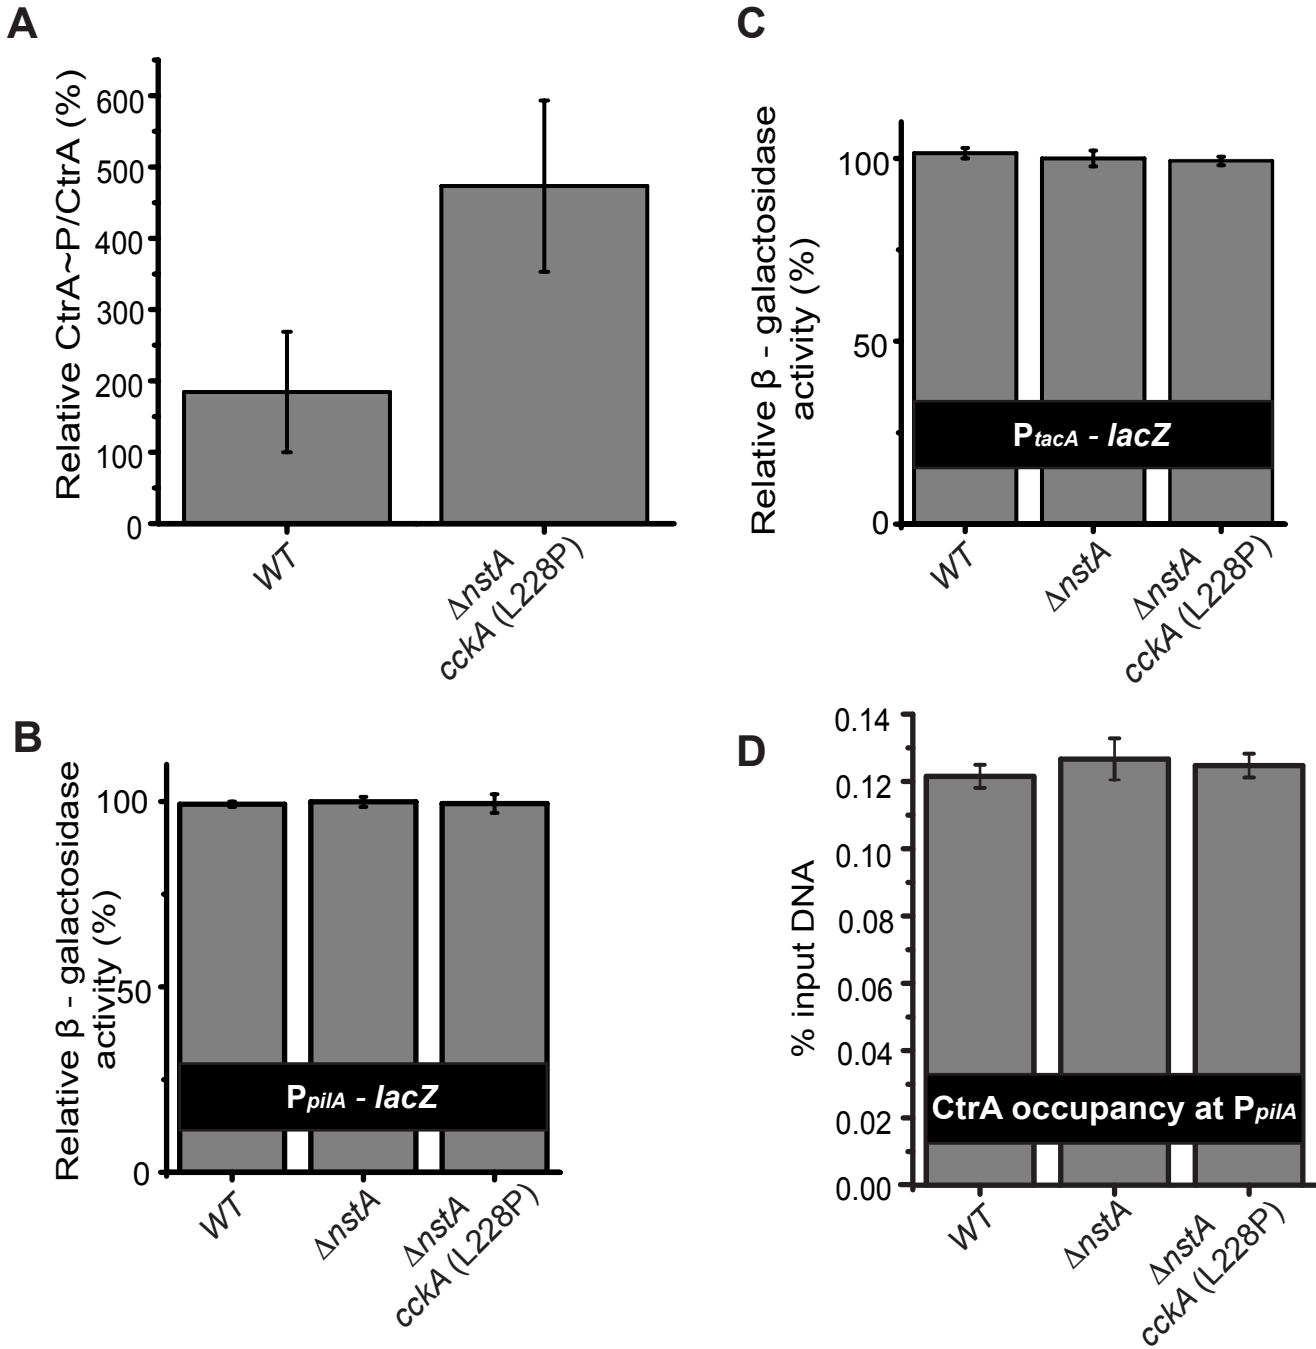

A

bioRxiv preprint doi: <https://doi.org/10.1101/300178>; this version posted April 14, 2018. The copyright holder for this preprint (which was not certified by peer review) is the author/funder. All rights reserved. No reuse allowed without permission.

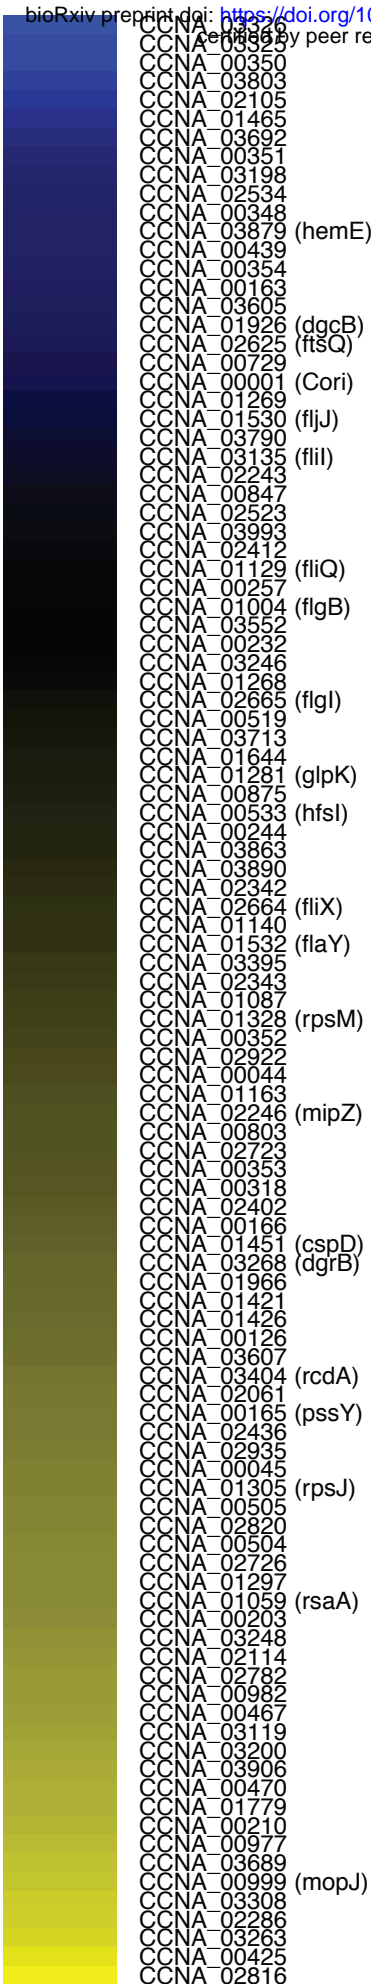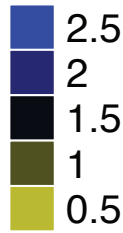

B

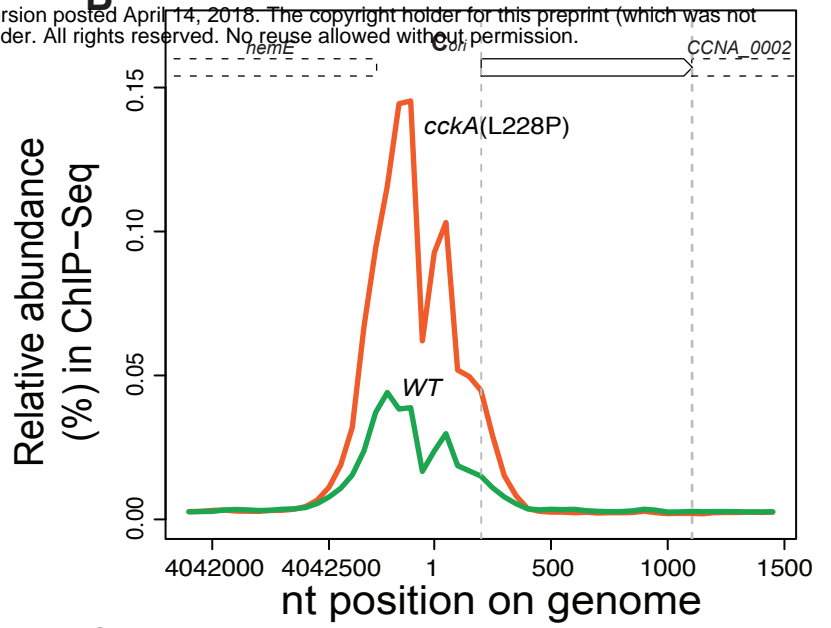

C

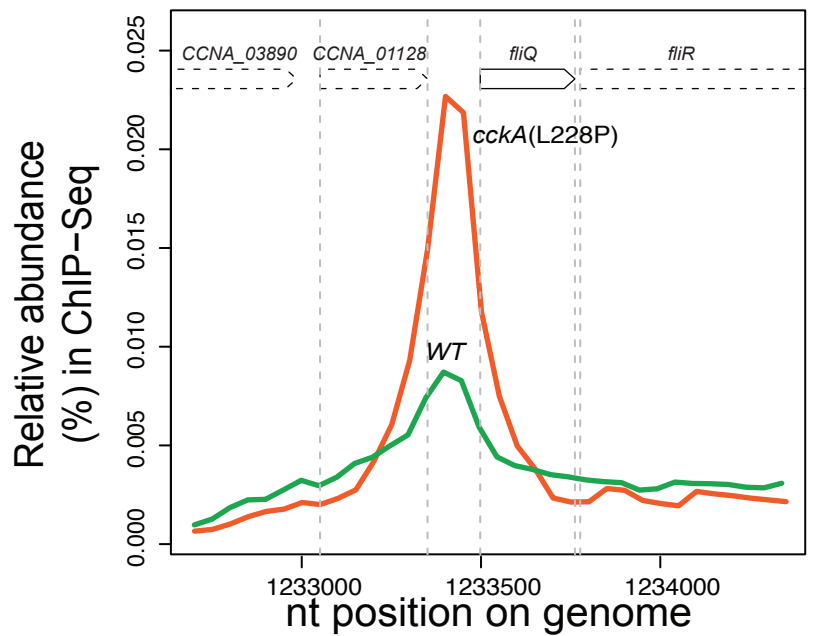

D

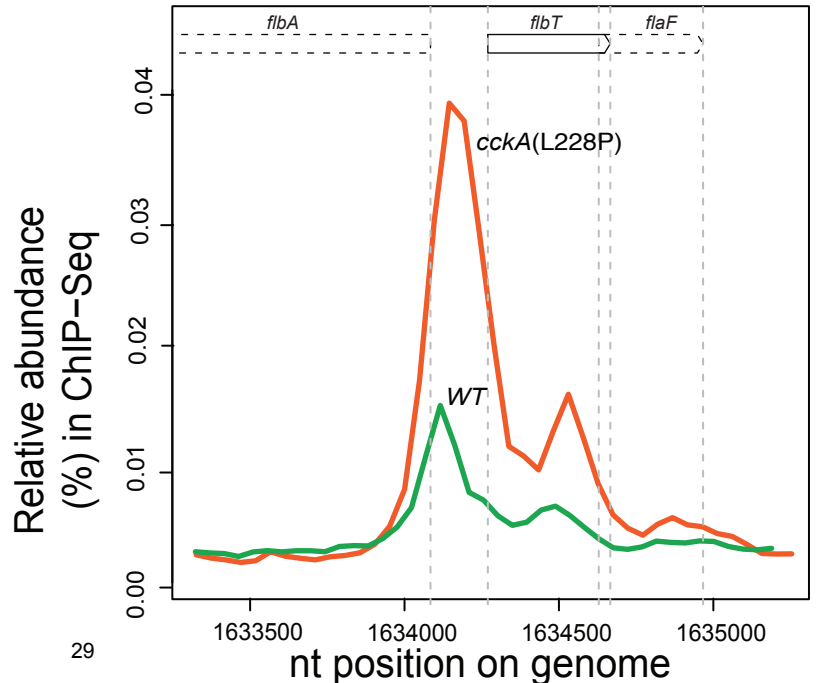

# Narayanan et al. Figure 4

bioRxiv preprint doi: <https://doi.org/10.1101/300178>; this version posted April 14, 2018. The copyright holder for this preprint (which was not certified by peer review) is the author/funder. All rights reserved. No reuse allowed without permission.

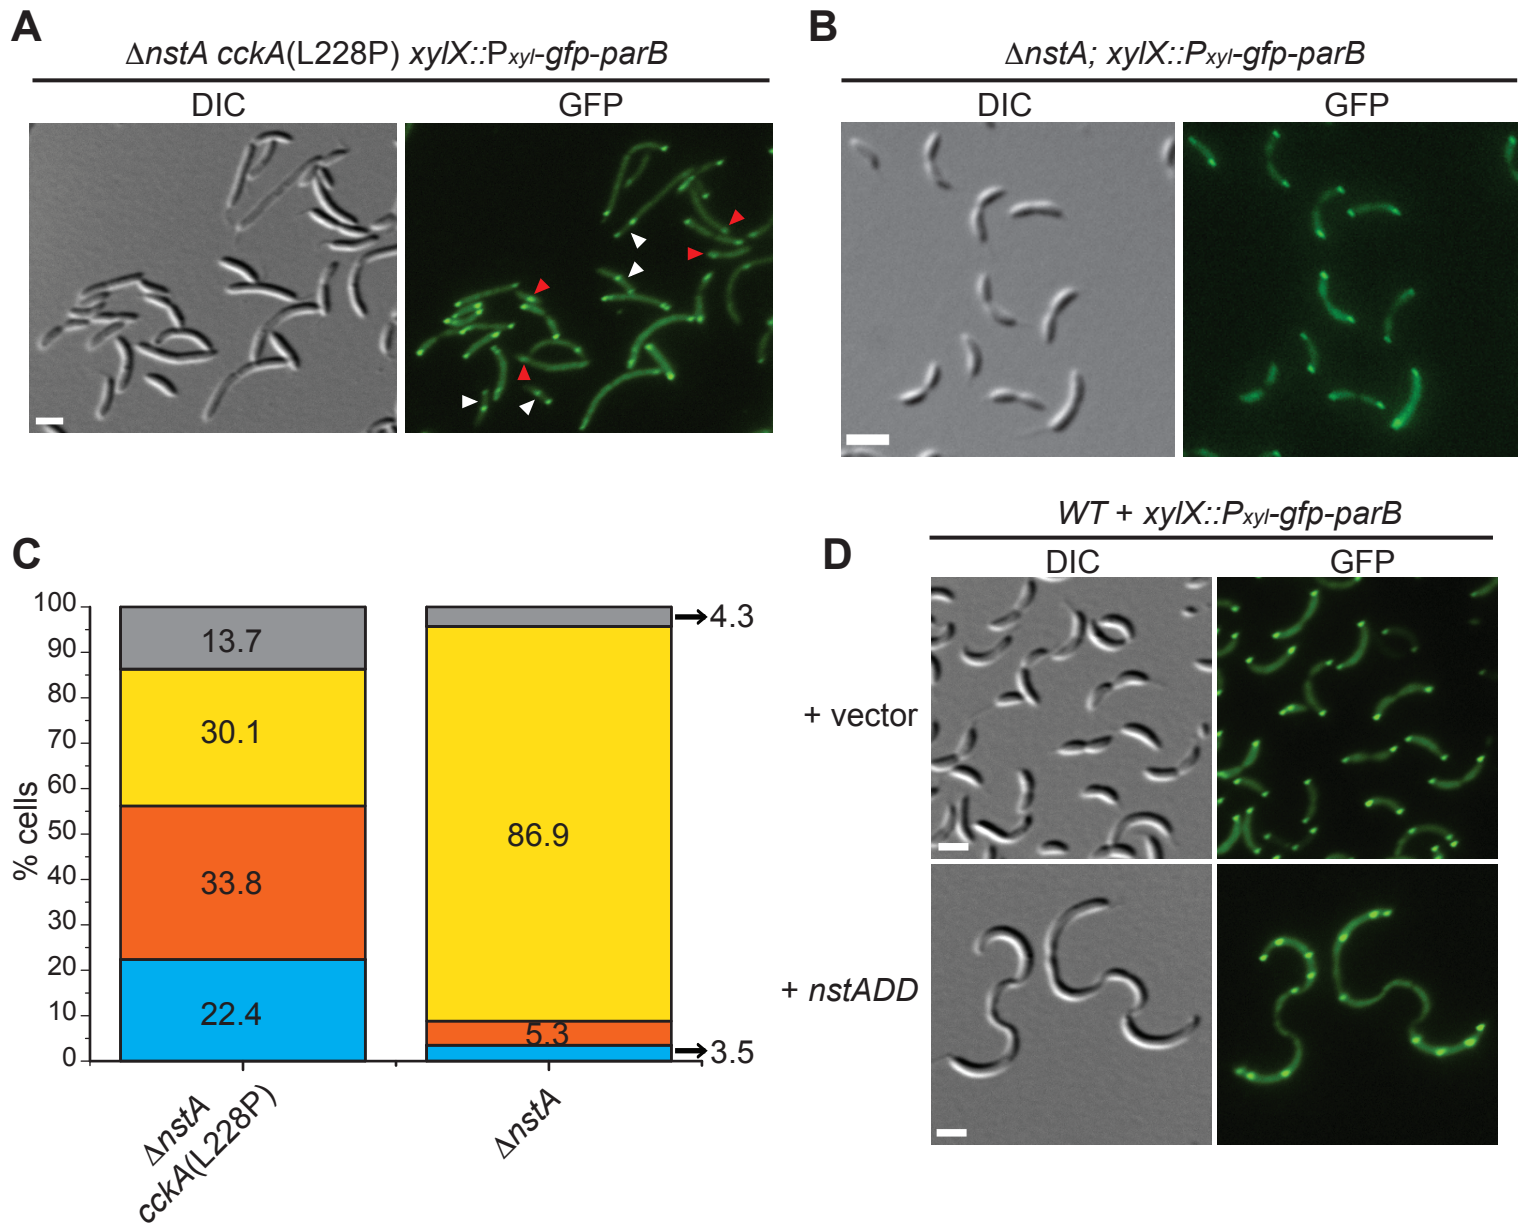

**A** bioRxiv preprint doi: <https://doi.org/10.1101/300178>; this version posted April 14, 2018. The copyright holder for this preprint (which was not certified by peer review) is the author/funder. All rights reserved. No reuse allowed without permission.

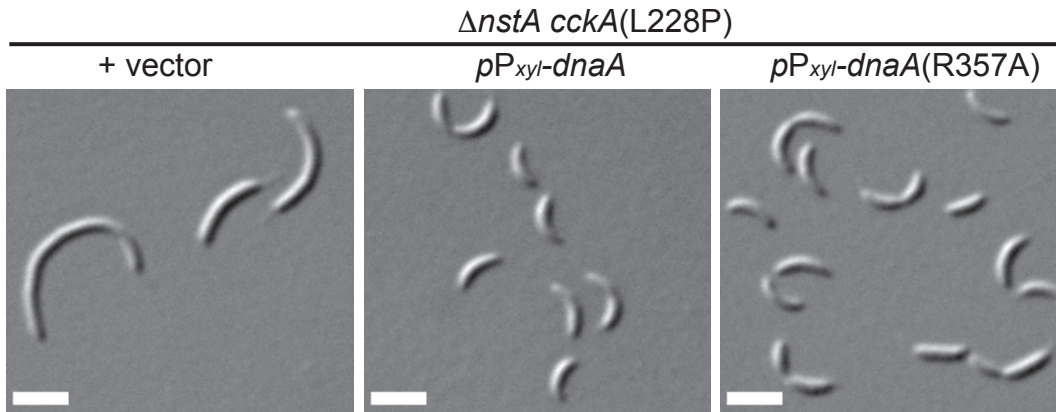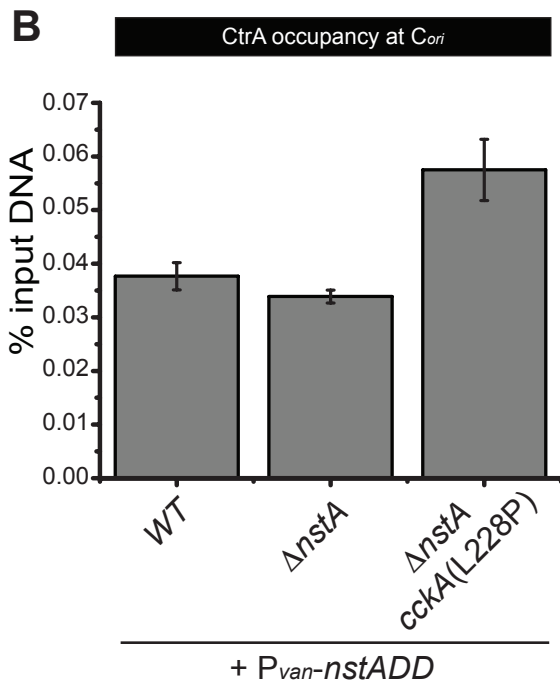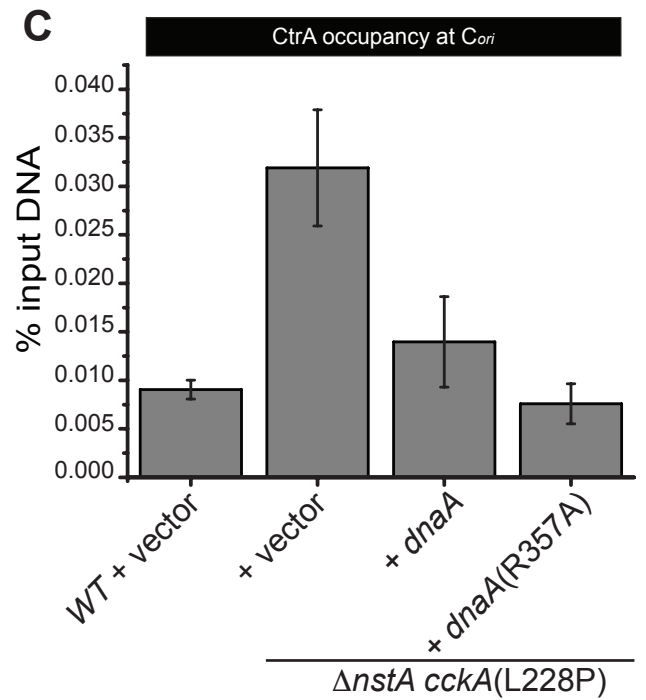

bioRxiv preprint doi: <https://doi.org/10.1101/300178>; this version posted April 14, 2018. The copyright holder for this preprint (which was not certified by peer review) is the author/funder. All rights reserved. No reuse allowed without permission.

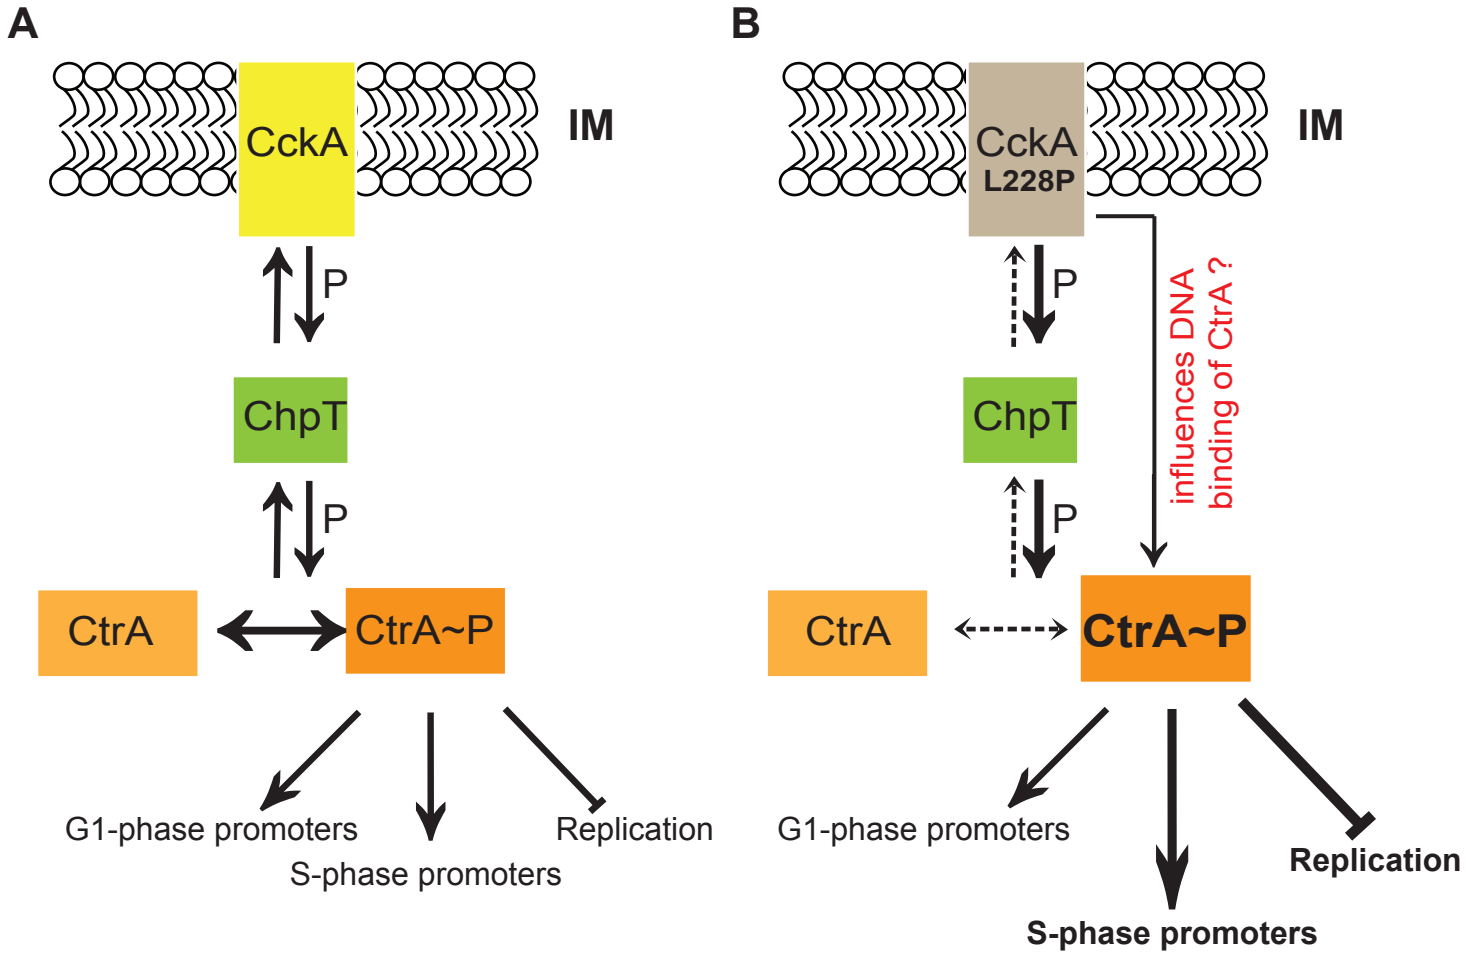



## 1 SUPPLEMENTARY INFORMATION

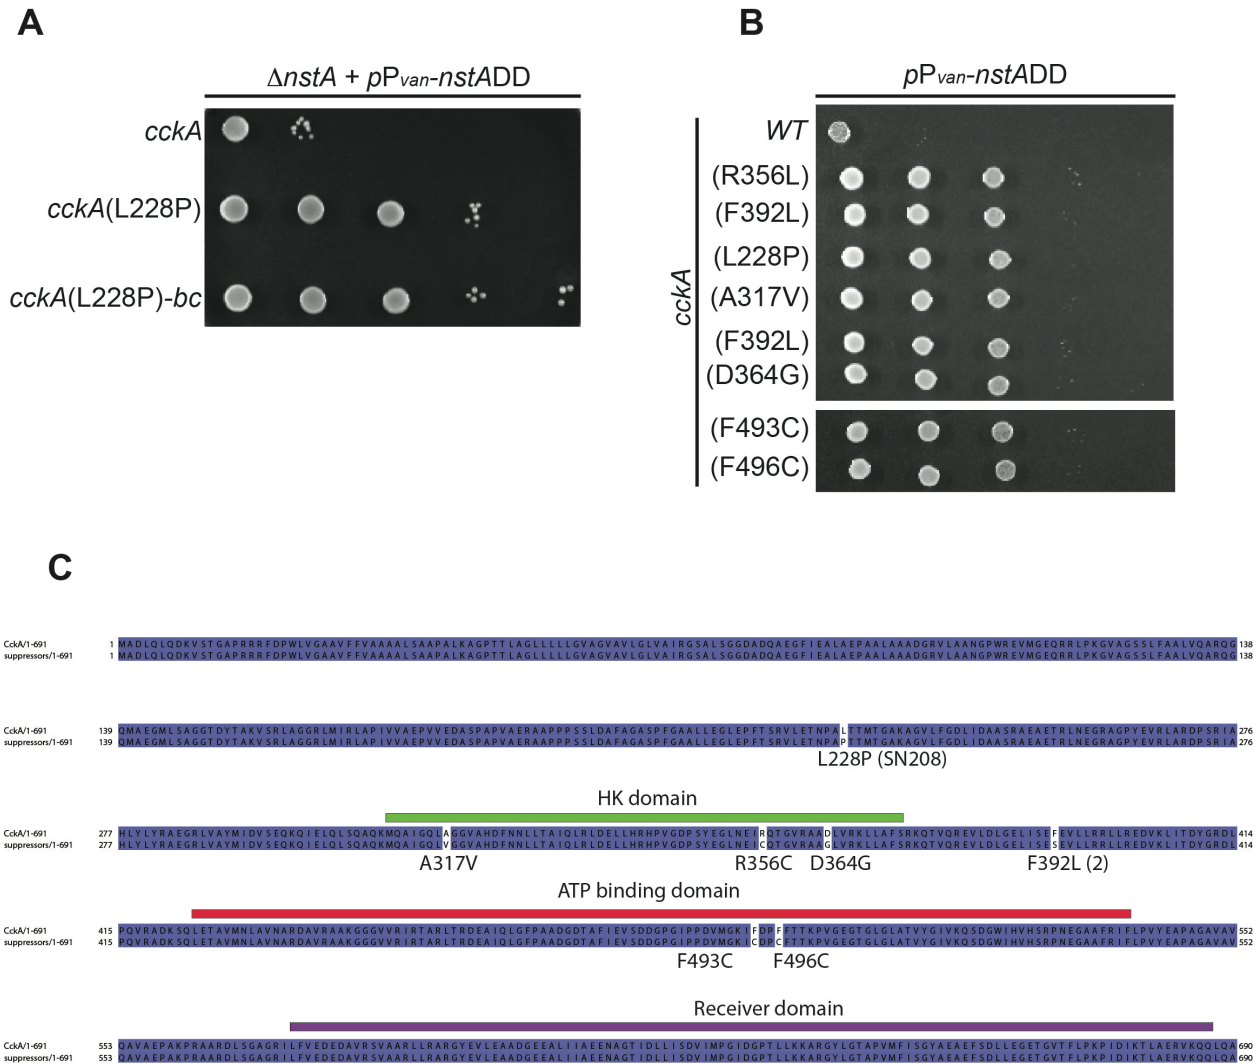

2

3

4 **Supplementary Figure S1.** (A) Growth of  $\Delta nstA$  cells overproducing NstADD, and  
 5 harboring either *wild-type* *cckA* or *cckA*(L228P) or *cckA*(L228P)-back-cross (bc). (B)  
 6 Growth of *Caulobacter* harboring the *wild-type* *cckA*, or NstADD toxicity suppressor  
 7 mutants of *cckA*, upon *nstADD* overexpression. In (A) and (B), cells were diluted five-  
 8 fold and spotted on media containing 0.5 mM vanillate. The mutant *cckA*(F496C) is in  
 9 the  $\Delta nstA$  genetic background, the rest were in *WT* background. (C) Schematic  
 10 denoting the CckA suppressor mutations. The CckA(L228P) mutation resides in the  
 11 PAS-B domain, whereas the other point mutations are harbored either in the histidine  
 12 kinase domain or the ATP binding domain of CckA.

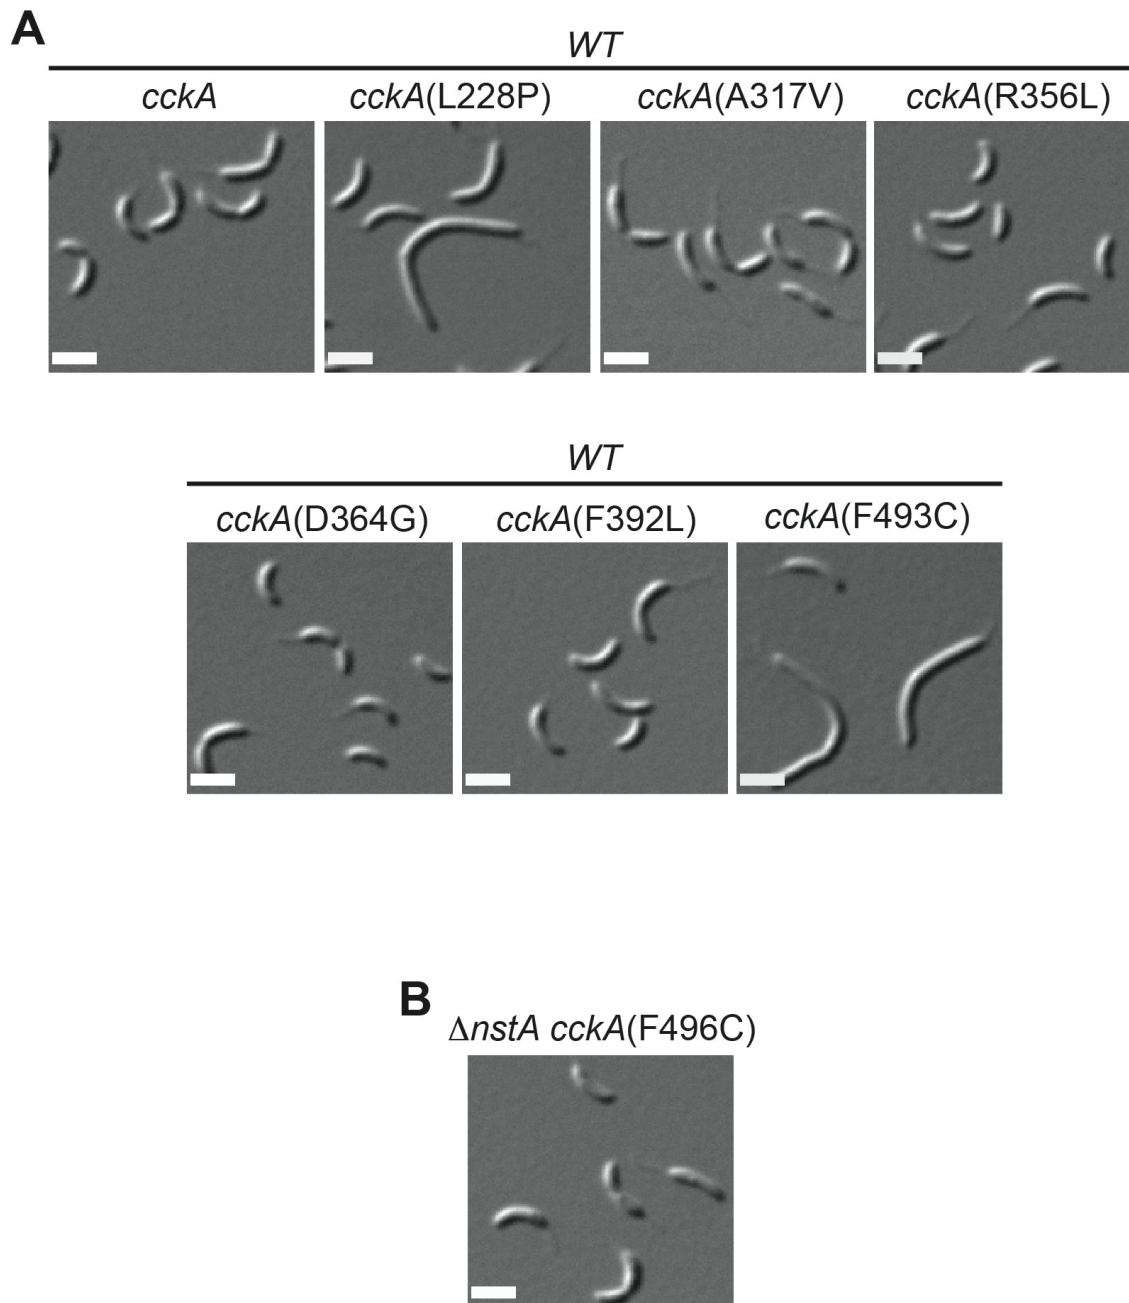

13

14

15

16 **Supplementary Figure S2.** (A) DIC images of the various point mutants of *cckA* in *WT*  
17 genetic background. (B) DIC image of  $\Delta$ *nstA* *cckA(F496C)* mutant.

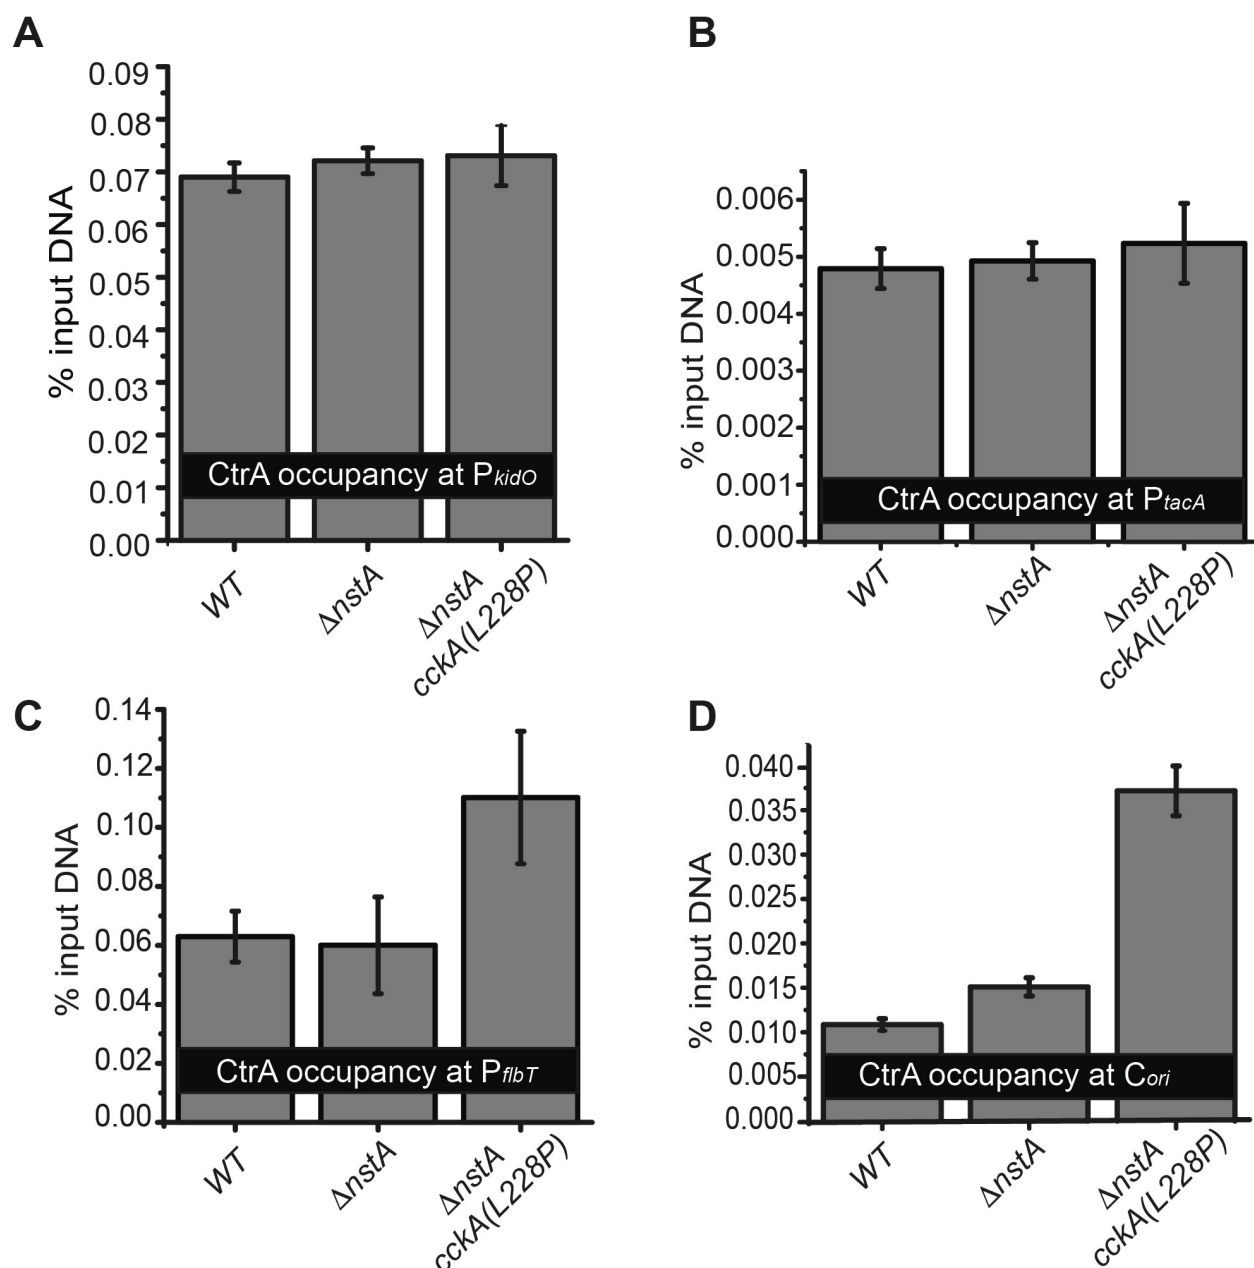

18

19

20 **Supplementary Figure S3.** The qChIP data indicating the CtrA occupancy at (A) the  
21 promoter of *kidO* ( $P_{kidO}$ ), (B) the promoter of *tacA* ( $P_{tacA}$ ), (C) the promoter of *flbT* ( $P_{flbT}$ )  
22 and (D) at the chromosomal origin of replication,  $C_{ori}$ , in WT,  $\Delta nstA$ , and  $\Delta nstA$   
23 cckA(L228P) cells. The data represented are the average of 3 independent experiments  
24  $\pm$ SE.

25

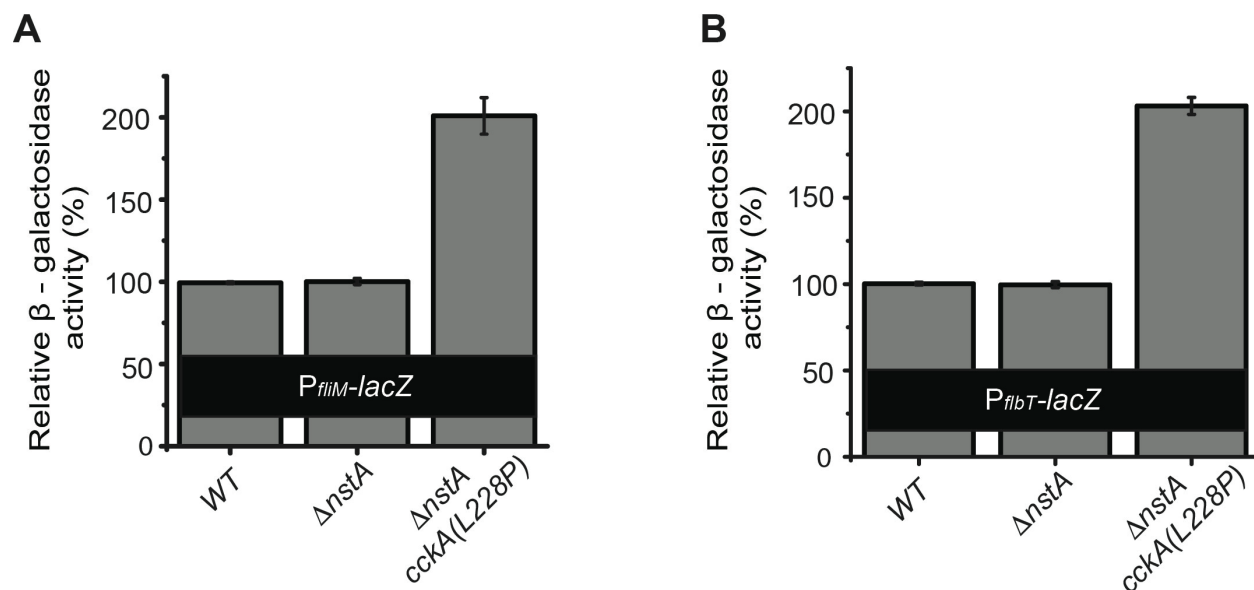

26

27

28 **Supplementary Figure S4.** Relative  $\beta$ -galactosidase activities of (A)  $P_{fiiM}$ -lacZ reporter,  
29 and (B)  $P_{fibT}$ -lacZ reporter, in WT,  $\Delta nstA$ , and  $\Delta nstA$  cckA(L228P) cells. The data  
30 represented in (A) and (B) are the average of 3 independent experiments  $\pm$ SE.

31

32

33

34

35

36

37

38

## 39 **Supplementary Methods**

### 40 **Strain construction**

41 The various *cckA* point mutant strains namely **SN208** [ $\Delta nstA$  *cckA* (L228P)],  
42 **LK98** [*WT cckA*(R356C)], **LK100** [ $\Delta nstA$  *cckA*(F496C)], **LK109** [*WT cckA*(L228P)],  
43 **LK122** [*WT cckA*(A317V)], **LK124** [*WT cckA*(F493C)], **LK128** [*WT cckA*(F392L)] and  
44 **LK135** [*WT cckA*(D364G)] were generated by Ultraviolet (UV) radiation based  
45 mutagenesis using *WT* or SKR1797 ( $\Delta nstA$ ) (1).

46 The strains namely **SN227** [ $\Delta nstA$  *cckA* (L228P) + pMT 335-*nstADD*], **SN1140**  
47 [*WT cckA*(L228P) + pMT335- $P_{van}$ -*nstADD*], **SN1141** [*WT cckA*(A317V) + pMT335- $P_{van}$ -  
48 *nstADD*], **SN1142** [*WT cckA*(F493C) + pMT335- $P_{van}$ -*nstADD*], **SN1144** [*WT*  
49 *cckA*(F392L) + pMT335- $P_{van}$ -*nstADD*], **SN1145** [*WT cckA*(D364G) + pMT335- $P_{van}$ -  
50 *nstADD*], **SN1151** [*WT cckA*(R356C) + pMT335- $P_{van}$ -*nstADD*] and **SN1152** [ $\Delta nstA$   
51 *cckA*(F496C) + pMT335- $P_{van}$ -*nstADD*] were made by electroporating pSKR126 ( $pP_{van}$ -  
52 *nstADD*) (1) into SN208 [ $\Delta nstA$  *cckA* (L228P)], LK109 [*WT cckA*(L228P)], LK122 [*WT*  
53 *cckA*(A317V)], LK124 [*WT cckA*(F493C)], LK128 [*WT cckA*(F392L)], LK135 [*WT*  
54 *cckA*(D364G)], LK98 [*WT cckA*(R356C)] and LK100 [ $\Delta nstA$  *cckA*(F496C)] respectively,

55 The strains **SN377** (*WT*; *xyiX*:: $P_{xyi}$ -*gfp-parB*), **SN379** [ $\Delta nstA$  *cckA*(L228P);  
56 *xyiX*:: $P_{xyi}$ -*gfp-parB*] and **SN559** ( $\Delta nstA$ ; *xyiX*:: $P_{xyi}$ -*gfp-parB*) were made by  
57 electroporating pSN190 (pXGFP4C1- $P_{xyi}$ -*gfp-parB*) into *WT*, SN208 and SKR1797  
58 respectively.

59 The strains **SN461** [ $\Delta nstA$  *cckA*(L228P) + pJSX-*dnaA*], **SN465** [ $\Delta nstA$   
60 *cckA*(L228P) + pJSX-*dnaA* (R357A)] and **SN467** [ $\Delta nstA$  *cckA*(L228P)+pJS14] were

61 made by electroporating pJSX-*dnaA*, pJSX-*dnaA* (R357A) (2) and pJS14 into SN208,  
62 respectively.

63 The strains **SN505** (*WT*; *xyiX*::  $P_{xyi}$ -*gfp-parB* + pMT335) and **SN1153** (*WT*;  
64 *xyiX*:: $P_{xyi}$ -*gfp-parB* + pMT335- $P_{van}$ -*nstADD*) were made by electroporating pMT335 (3)  
65 and pSKR126 into the strain SN377, respectively.

66 The strains **SN740** (*WT* + pLac290- $P_{pilA}$ -*lacZ*), **SN742** ( $\Delta nstA$  + pLac290- $P_{pilA}$ -  
67 *lacZ*) and **SN744** [ $\Delta nstA$  *cckA*(L228P) + pLac290- $P_{pilA}$ -*lacZ*] were made by  
68 electroporating pJS70 (pLac290- $P_{pilA}$ -*lacZ*) (4) into *WT*, SKR1797 and SN208,  
69 respectively.

70 The strains **SN741** (*WT* + pLac290- $P_{tacA}$ -*lacZ*), **SN743** ( $\Delta nstA$  + pLac290- $P_{tacA}$ -  
71 *lacZ*) and **SN745** [ $\Delta nstA$  *cckA*(L228P) + pLac290- $P_{tacA}$ -*lacZ*] were made by  
72 electroporating pMV05 (pLac290- $P_{tacA}$ -*lacZ*) (5) into *WT*, SKR1797 and SN208,  
73 respectively.

74 The strains **SN1361** (*WT* + pLac290- $P_{fiiM}$ -*lacZ*), **SN1365** ( $\Delta nstA$  + pLac290- $P_{fiiM}$ -  
75 *lacZ*) and **SN1369** [ $\Delta nstA$  *cckA*(L228P) + pLac290- $P_{fiiM}$ -*lacZ*] were made by  
76 electroporating pLac290- $P_{fiiM}$ -*lacZ* into *WT*, SKR1797 and SN208, respectively.

77 The strains **SN1406** (*WT* + pLac290- $P_{fiiB}$ -*lacZ*), **SN1407** ( $\Delta nstA$  + pLac290- $P_{fiiB}$ -  
78 *lacZ*) and **SN1408** [ $\Delta nstA$  *cckA*(L228P) + pLac290- $P_{fiiB}$ -*lacZ*] were made by  
79 electroporating pLac290- $P_{fiiB}$ -*lacZ* into *WT*, SKR1797 and SN208, respectively.

80 The *cckA*(L228P) back cross strain **SN769** [ $\Delta nstA$ ; *cckA*(L228P)] was made by  
81 backcrossing the *cckA*(L228P) point mutation in SN208 into SKR1797. pSN155

82 (pNPTS-*cckA* backcross construct) was used to transform SN208 and the transformants  
83 were plated on PYE supplemented with Kanamycin. Further  $\phi$ Cr30 lysates of the  
84 transformants were made and was used for transducing into SKR1797 thereby  
85 generating SN769. The backcross strain, SN769, was electroporated with pSKR126, to  
86 obtain **SN771** [ $\Delta$ *nstA*; *cckA*(L228P) + pMT335- $P_{van}$ -*nstADD*].

87 The strain SKR1800 (*WT* + pMT335- $P_{van}$ -*nstADD*) is previously described (1).

## 88 **Plasmid construction**

89 The plasmid **pSN155** (pNPTS-*cckA*-backcross) construct was made by  
90 PCR amplifying a region 750bp (approx.) upstream of *cckA*. The PCR fragment was  
91 digested with *EcoRI/HindIII*. The digested fragment was ligated into pNPTS138 (M.R.K  
92 Alley, unpublished) cut with *EcoRI/HindIII*.

93 Plasmid **pSN190** (pXGFP4-C1- $P_{xyI}$ -*gfp-parB*) was made by PCR amplifying *parB*  
94 and cleaving it with *Bg/II/EcoRI*, wherein the predicted the start codon ATG was  
95 replaced with GTG that carried an overlapping *Bg/II* recognition site to allow proper  
96 placement of *parB* facilitating N-terminal GFP fusion. The alleles were ligated into  
97 pXGFP4-C1 vector (M.R.K Alley unpublished) cut with *Bg/II/EcoRI*.

98 To make **pSN205** ( $P_{flIM}$ -*lacZ*, a kind gift from Patrick Viollier) nucleotides  
99 2298862-2299971 of NA1000 genome (CP001340) was amplified and ligated as  
100 *EcoRI/HindIII* fragment into a medium-copy plasmid pJGZ290 (6) to drive the  
101 transcription of the promoterless *lacZ* gene.

102

103 Plasmid **pSN206** ( $P_{fibT}$ -*lacZ*, a kind gift from Patrick Viollier) was made by  
104 amplifying nucleotides 1633750-1634327 of the NA1000 genome (CP001340) and  
105 ligating as *EcoRI/HindIII* fragment into the medium-copy plasmid pJGZ290 (6) to drive  
106 the transcription of the promoterless *lacZ* gene.

## 107 References

- 108 1. Narayanan, S., Janakiraman, B., Kumar, L. and Radhakrishnan, S.K. (2015) A  
109 cell cycle-controlled redox switch regulates the topoisomerase IV activity. *Genes*  
110 *Dev*, **29**, 1175-1187.
- 111 2. Fernandez-Fernandez, C., Gonzalez, D. and Collier, J. (2011) Regulation of the  
112 activity of the dual-function DnaA protein in *Caulobacter crescentus*. *PLoS One*,  
113 **6**, e26028.
- 114 3. Thanbichler, M., Iniesta, A.A. and Shapiro, L. (2007) A comprehensive set of  
115 plasmids for vanillate- and xylose-inducible gene expression in *Caulobacter*  
116 *crescentus*. *Nucleic Acids Res*, **35**, e137.
- 117 4. Skerker, J.M. and Shapiro, L. (2000) Identification and cell cycle control of a  
118 novel pilus system in *Caulobacter crescentus*. *Embo J*, **19**, 3223-3234.
- 119 5. Marques, M.V., Gomes, S.L. and Gober, J.W. (1997) A gene coding for a  
120 putative sigma 54 activator is developmentally regulated in *Caulobacter*  
121 *crescentus*. *J Bacteriol*, **179**, 5502-5510.
- 122 6. Ditta, G., Stanfield, S., Corbin, D. and Helinski, D.R. (1980) Broad host range  
123 DNA cloning system for gram-negative bacteria: construction of a gene bank of  
124 *Rhizobium meliloti*. *Proc Natl Acad Sci U S A*, **77**, 7347-7351.

125
